1  
2  
3  
4  
5  
6  
7  
8  
9  
10  
11  
12  
13  
14  
15  
16  
17  
18  
19  
20  
21  
22  
23  
24  
25  
26  
27  
28  
29  
30  
31  
32  
33  
34  
35  
36  
37  
38  
39  
40  
41

# Multimodal Analysis for Human ex vivo Studies Shows Extensive Molecular Changes from Delays in Blood Processing

## Author list

Adam K. Savage<sup>1,9,\*,#</sup>, Miriam V. Gutschow<sup>1,5,9</sup>, Tony Chiang<sup>1,6,9</sup>, Kathy Henderson<sup>1</sup>, Richard Green<sup>1</sup>, Monica Chaudhari<sup>1,7</sup>, Elliott Swanson<sup>1</sup>, Alexander T. Heubeck<sup>1</sup>, Nina Kondza<sup>1</sup>, Kelli C. Burley<sup>1</sup>, Palak C. Genge<sup>1</sup>, Cara Lord<sup>1,8</sup>, Tanja Smith<sup>1</sup>, Zachary Thomson<sup>1</sup>, Aldan Beaubien<sup>1</sup>, Ed Johnson<sup>1</sup>, Jeff Goldy<sup>2</sup>, Hamid Bolouri<sup>3</sup>, Jane H. Buckner<sup>4</sup>, Paul Meijer<sup>1</sup>, Ernest M. Coffey<sup>1</sup>, Peter J. Skene<sup>1</sup>, Troy R. Torgerson<sup>1</sup>, Xiao-jun Li<sup>1</sup>, and Thomas F. Bumol<sup>1,10</sup>

## Affiliations

<sup>1</sup>Allen Institute for Immunology, Seattle, WA 98109, USA  
<sup>2</sup>Allen Institute for Brain Science, Seattle, WA 98109, USA  
<sup>3</sup>Center for Systems Immunology, Benaroya Research Institute, Seattle, WA 98101, USA  
<sup>4</sup>Center for Translational Research, Benaroya Research Institute, Seattle, WA 98101, USA  
<sup>5</sup>Present address: Bristol Myers Squibb, Seattle, WA 98102, USA  
<sup>6</sup>Present address: Pacific Northwest National Laboratory, Seattle, WA 98109, USA  
<sup>7</sup>Present address: Novartis, Basel, Switzerland  
<sup>8</sup>Present address: GlaxoSmithKline, Collegeville, PA 19426, USA  
<sup>9</sup>The authors contributed equally.  
<sup>10</sup>Senior author  
\*Correspondence: [adam.savage@alleninstitute.org](mailto:adam.savage@alleninstitute.org)  
#Lead contact

42 **Keywords**

43

44 PBMC – Peripheral Blood Mononuclear Cells

45 Flow Cytometry

46 Immunophenotype

47 Single Cell Transcriptomics

48 Plasma Proteomics

49

50

51

52

53 **Summary**

54 Multi-omic profiling of human peripheral blood is increasingly utilized to identify biomarkers  
55 and pathophysiologic mechanisms of disease. The importance of these platforms in clinical  
56 and translational studies led us to investigate the impact of delayed blood processing on the  
57 numbers and state of peripheral blood mononuclear cells (PBMC) and on the plasma  
58 proteome. Similar to previous studies, we show minimal effects of delayed processing on the  
59 numbers and general phenotype of PBMCs up to 18 hours. In contrast, profound changes in  
60 the single-cell transcriptome and composition of the plasma proteome become evident as  
61 early as 6 hours after blood draw. These reflect patterns of cellular activation across diverse  
62 cell types that lead to progressive distancing of the gene expression state and plasma  
63 proteome from native *in vivo* biology. Differences accumulating during an overnight rest (18  
64 hours) could confound relevant biologic variance related to many underlying disease states.

65

## 66 Introduction

67 Advances in “-omics” technologies now provide scientists with the ability to probe human  
68 biology and biologic variance with high sensitivity at the single cell level. These approaches  
69 have been of particular benefit to studies of immune-mediated diseases in humans where  
70 deep profiling of peripheral blood and peripheral immune cells has provided insights to  
71 underlying pathobiology, unique biomarkers of disease, and biological variation. The ability  
72 to reliably discern the state of individual cells and discover true biologic heterogeneity in a  
73 complex system like peripheral blood requires that the effects of sample handling and  
74 storage not overwhelm those associated with the underlying biology. The logistical  
75 challenges related to collecting, processing, and shipping blood in human studies and  
76 particularly in clinical trials can make the application of these highly sensitive technologies a  
77 challenge. At present, there is a dearth of multi-modal studies that provide practical  
78 guidance about how quickly peripheral blood samples need to be processed and which cells  
79 and cell pathways are most impacted by delayed processing.

80 Peripheral blood mononuclear cells (PBMC) are a workhorse of human immunology owing  
81 to the ease of collection and simplicity of cell isolation. Whole blood, from which PBMC are  
82 derived, is understood to be remarkably stable and previous work has established support  
83 for flexibility in sample handling for various whole blood assays, often as a way of managing  
84 the inherent challenges of human blood collection. Studies have shown that, when collected  
85 into anti-coagulant tubes to prevent clotting, whole blood left to “rest” was shown to be  
86 stable up to 24 hours at room temperature (Wu et al., 2017; Zini, 2014) and plasma profiling  
87 for common metabolites was similarly robust (van Eijsden et al., 2005; Zimmerman et al.,  
88 2012). Other data, however, demonstrated the potential for profound changes resulting from  
89 variability in sample handling, particularly in the context of untargeted assays such as those  
90 for transcriptomic analysis. Overnight delay of PBMC isolation from whole blood was shown  
91 to alter thousands of genes, in particular JUN, FOS, and the heat shock pathway (Baechler  
92 et al., 2004), and even delays as short as four hours led to substantial changes, especially  
93 in immune-related gene expression (Barnes et al., 2010; Massoni-Badosa et al., 2020).  
94 Particularly problematic are processing artifacts that impact a wide variety of genes and  
95 proteins related to immunity in health and disease, which can obscure the disease  
96 processes of interest (Dvinge et al., 2014). Missing from previous analyses, however, is a  
97 comprehensive, multi-modal approach from which to understand the full complexity of *ex*  
98 *vivo* biology and its impact on physiological signals.

99 In an effort to clearly address these questions prior to initiating a series of multi-center  
100 clinical studies focused on human immunology, we performed deep, multi-modal profiling of  
101 human peripheral blood stored in anticoagulant for varying lengths of time before processing  
102 to plasma and peripheral blood mononuclear cells (PBMC). This resource provides clear  
103 insights into the rapid changes related to delayed sample processing, elucidating the cells  
104 most altered, the cellular pathways most impacted, and the assays most affected. While flow  
105 cytometry did not reveal large-scale changes in cell type frequencies through an 18-hour  
106 delay, single-cell gene expression and high-plex plasma proteomics provide overwhelming  
107 evidence that cells of all types exhibit time-dependent changes that distorts the underlying  
108 biology. These changes are broad and dynamic, complicating the technical analysis of  
109 single-cell RNA-seq data and especially inferences of *in vivo* physiology from *ex vivo*  
110 assays. We propose the affected proteins and genes be carefully considered in any human  
111 biology study or clinical trial that uses blood and/or PBMCs to reflect *in vivo* biology, and that  
112 these findings may extend to blood- and immune-cell permeated tissue, as well. To assist in  
113 their use, we provide these data in an easily explorable web-accessible tool  
114 (<http://bloodprocessingdelay.allenimmunology.org>). The baseline cytometry, proteomic, and  
115 transcriptomic data on 10 donors serve as a high-quality resource to accelerate human  
116 systems immunology research and provide the substrate to begin decoding these effects in  
117 existing and emerging studies.

118

119

## 120 Results

### 121 Bulk transcriptomics identifies time-dependent changes unrecognized by cytometry

122 To study the effects of delays in PBMC processing from whole blood we performed two  
123 similar but independent experiments (**Figure 1A**). In Experiment 1, we isolated PBMC or  
124 plasma from whole blood at 2, 4, 6, 8, and 18 hours after blood draw from healthy donors  
125 (n=3) or those diagnosed with systemic lupus erythematosus (SLE, n=3). In Experiment 2,  
126 we assayed PBMC or plasma isolated from only healthy donors (n=4) starting at 2, 4, 6, 10,  
127 14, and 18 hours after blood draw. In both experiments, the whole blood was held in the  
128 dark at room temperature prior to PBMC isolation by Ficoll gradient separation or plasma  
129 isolation. PBMC were assayed after freeze/thaw by flow cytometry and 10x Genomics  
130 single-cell RNA-sequencing, and the plasma by Olink proteomics. Details of the samples,  
131 the assays used in each experiment, and any deviations are available in the Methods.  
132 Important to data interpretation, the samples were held as whole blood in phlebotomy tubes  
133 prior to processing. Thus, the samples were a closed system, obviating the confounding  
134 effects of cellular migration and blood cell development as sources of time-dependent  
135 variability.

136 We started by assessing basic metrics from our technical processes. Cell yields from PBMC  
137 isolation, and their viability, did not exhibit time-dependent changes (**Supplemental Figures**  
138 **S1A-B**). Nor were the cells somehow more “fragile”, as they exhibited similar post-thaw  
139 recovery and viability at any time of isolation (**Supplemental Figures S1C-D**). This overall  
140 consistency was substantiated by flow cytometry profiling of the major immune cell types  
141 present in PBMC, most of which did not show noticeable changes throughout the processing  
142 delay time series (**Figure 1B** and **Supplemental Figure S2A-B**). Neutrophils (CD15<sup>+</sup> SSC<sup>hi</sup>  
143 cells), however, were apparently increased over the time course in both experiments  
144 (**Figures 1C** and **Supplemental Figure S2C-D**), consistent with previous data (McKenna et  
145 al., 2009; Nicholson et al., 1984), suggesting an increased recovery of low-density  
146 neutrophils by Ficoll gradient separation with longer delays in PBMC processing. In addition,  
147 more granular flow cytometry profiling in Experiment 2 showed decreases in plasmablasts,  
148 non-classical monocytes, and basophils (**Figures 1D-F**), though with the less extensive  
149 phenotyping in Experiment 1 we cannot confirm these observations. Nevertheless, with the  
150 exception of rare neutrophils, time-dependent effects on the abundance of cell types were  
151 modest.

152 The minor effects seen by cytometry could result from subtle changes in PBMC isolation and  
153 PBMC survival, but little can be inferred of cellular activation or stress from the flow  
154 cytometry panels used in this study to quantitate cell types. To get a better understanding of  
155 cellular activity, we first assayed bulk PBMC from the six donors in Experiment 1 by targeted  
156 transcriptomics with the Nanostring nCounter platform. This clinical assay enumerates a  
157 panel of 594 pre-selected immune- and disease-relevant transcripts from a bulk cell sample.  
158 Despite well documented person-to-person variability in PBMC gene expression  
159 (Kaczorowski et al., 2017; Radich et al., 2004; Whitney et al., 2003), Principal Component  
160 Analysis (PCA) indicated that PBMC processing delay accounted for a substantial part of  
161 the variability (**Supplemental Figure S3**). These effects were reflected in unsupervised  
162 clustering of the data, where it was apparent that expression levels across nearly the entire  
163 targeted gene set are inverted at 18 hours post-blood draw compared to the previous time  
164 point (**Figure 2A**, box indicated by the solid line). A feature of this longitudinal data set is  
165 that gene regulation dynamics can be observed, revealing that in all six donors a subset of  
166 these genes underwent an earlier induction before returning to low levels (box indicated by  
167 the dashed line). Aggregate analysis highlighted common and progressive exaggeration of

168 changes over the time course (**Figure 2B**), with 85 genes significantly induced (including  
169 *IL20*, *DEFB4A*, *DUSP4*, *LILRB5*) and 261 genes significantly down-regulated (including PD-  
170 1 (*PDCD1*), *ST2* (*IL1RL1*), *CX3CL1*, and *CCR2*) at 18 hours relative to 2 hours post-draw  
171 (**Figure 2C-D** and **Supplemental Table S1**). Without the context of the longitudinal data,  
172 these expression patterns could suggest physiologic biology that was not actually present in  
173 the host. Therefore, we conclude that while the cells themselves are generally robust to  
174 processing delays, their biological profile is greatly impacted.

175

## 176 **Delayed processing results in substantial changes to the plasma proteome**

177 The extensive changes recognized by bulk transcriptomics suggested that whole blood  
178 awaiting processing was an active and dynamic immune environment, and for numerous  
179 reasons we hypothesized there would be significant changes in plasma proteins as blood  
180 awaited processing: it has previously been reported that storage of whole blood led to  
181 increased levels of thrombospondin by eight hours (Kaisar et al., 2016), immune cells are  
182 known to respond to hemostasis (Jenne et al., 2013), temperature (Cho et al., 2010) and  
183 oxygen levels (Nizet and Johnson, 2009), and many transcripts demonstrating increases in  
184 our bulk transcriptomics assay encode secreted proteins (**Supplemental Table S1**). We  
185 speculated that not only were cells likely undergoing an intrinsic response, but that the  
186 extrinsic environment was likely changing as well.

187 To test this hypothesis, we interrogated the 54 samples in our study for 1161 plasma  
188 proteins using a dual-antibody targeted assay (Assarsson et al., 2014). We found nearly  
189 one-third of the proteins showed relative abundance varying with delayed processing in a  
190 combined analysis of both experiments (**Figure 3A** and **Supplemental Table S2**). While the  
191 number of proteins exhibiting significant change was only modestly increased over the time  
192 course (350 proteins at 4 hours to 469 proteins at 18 hours post-draw), the magnitude of the  
193 changes exhibited a shift from 6 hours onward. Only 5 proteins were 1.5-fold changed  
194 between 2 and 4 hours post-draw (*LAT*, *CD40L*, *EGF*, *PDGF $\beta$* , and *SDC4*), while by 6 hours  
195 27 proteins had changed by more than 1.5-fold and by 18 hours 69 proteins had changed by  
196 at least 1.5-fold, relative to the 2-hour time point. Given that whole blood waiting in  
197 phlebotomy tubes is a closed system, increases in plasma proteins must be due to *de novo*  
198 production or enhanced availability to detection. The latter may result from liberation of  
199 sequestration factors or modification of assay-targeted epitopes. In all cases, increases in  
200 detectable proteins over time suggest active biology in the waiting blood.

201 Some of the most highly affected protein levels suggest complex and coordinated activity.  
202 For example, *AnxA1* and *S100A11* directly interact on early endosomes, and *EGFR* can  
203 both lead to phosphorylation of and be degraded by *AnxA1* (Poeter et al., 2013). *ANXA1*,  
204 *S100A11*, and *EGF* protein are all increased in the plasma over time. More striking was that  
205 the number of platelet-related proteins significantly changed over time. In agreement with  
206 previous work (Khan et al., 2006), one of the earliest and most increased proteins was  
207 *CD40LG* (**Figures 3B-D** and **Supplemental Table S2**), a product of platelet activation  
208 (Henn et al., 1998). *PDGF $\beta$* , *ANGPT1*, *STK4*, *STX8*, *OSM*, and *SDC4*, were also rapidly and  
209 significantly increased. These proteins, some of which were reported previously (Shen et al.,  
210 2018), are all known to be involved in platelet biology (Andrae et al., 2008; Beck et al., 2017;  
211 Golebiewska et al., 2015; Londin et al., 2014; Tanaka et al., 2003), perhaps indicative of  
212 regulation or dysregulation of platelet activation in the waiting blood despite the presence of  
213 anti-coagulant. Fewer proteins exhibited decreases in abundance, with *APLP1* the most  
214 striking. *APLP1* can be processed by gamma-secretase but, unlike the homologs *APP* and  
215 *APLP2*, it was suggested that cleavage of *APLP1* could occur without ectodomain shedding  
216 (Schauenburg et al., 2018), potentially sequestering the protein intracellularly. *MMP7* also  
217 exhibited a significant decrease over the time course and was shown to be a target of  
218 platelet activation (Yang et al., 2020) and platelet-derived *CXCL4* (Erbel et al., 2015). These

219 data demonstrate that many of the strongest changes in plasma proteins in whole blood ex  
220 vivo relate to platelet biology.

221

## 222 **Single-cell transcriptomic profiling reveals reorganization of cell type-specific gene** 223 **expression**

224 While the majority of cell-type frequencies were essentially stable throughout the blood  
225 processing delay (**Figure 1**), plasma proteomics showed the signals available to those cells  
226 were dynamic and the corresponding bulk transcriptomics indicated similar changes in gene  
227 regulation, as might be expected from an immune system evolved to respond to  
228 extracellular signals. To better understand the impact of blood processing delay on distinct  
229 cell types we performed droplet-based single-cell RNA-sequencing on both experiments. In  
230 total, we collected and analyzed 450,189 high quality singlet cells with an average median  
231 features per cell of 1942 (**Supplemental Figure S4** and **Supplemental Table S3**), for a  
232 total of more than 800 million unique RNA molecules quantitated by single-cell RNA  
233 sequencing.

234 We assessed the overall effect of delayed blood processing across all cell types by  
235 aggregating together the samples in each experiment and summarizing the high-  
236 dimensional data set in two dimensions using tSNE (**Figure 4** and **Supplemental Figure**  
237 **S5**). With this visualization, it was clear that by 18 hours post-draw (purple) there was a  
238 profound shift in the global gene expression pattern per cell across multiple clusters, with  
239 the time effect dominating inter-donor variability. While this effect was clear and pervasive at  
240 18 hours in Experiment 1, we were concerned that the irregular time spacing (PBMC  
241 isolation at 2, 4, 6, 8, and 18 hours post-draw) was a confounder in the way the data  
242 clustered. We therefore changed the experimental design of Experiment 2 (PBMC isolation  
243 at 2, 4, 6, 10, 14, and 18 hours post-draw) so the later time points occurred at more regular  
244 intervals. The time-dependent divergence from the native transcriptional state was even  
245 more pronounced in Experiment 2, with a progressive distancing apparent at 10 hours (light  
246 blue), 14 hours (dark blue), and 18 hours (purple) post-draw. These effects were not  
247 restricted to a limited number of cell types, such as monocytes and dendritic cells (DC), but  
248 were apparent in all labeled cell types, even those thought to be quiescent, such as naive T  
249 cells (Sprent and Surh, 2011). These data demonstrate that analysis of global gene  
250 expression profiles in human PBMC can be confounded by pre-analytical process artifacts.

251 We were interested to more deeply understand the effect of blood processing delay on  
252 individual cell types to better define the changes on functionally distinct immune cell  
253 populations. To highlight cell type specific changes, we isolated the tSNE coordinates of the  
254 clusters mapping to selected cell types (**Figures 5A**) and quantified the occupancy of each  
255 cluster over the time course. In this approach, we infer that each cluster represents a distinct  
256 transcriptional state of a given cell type, such that a change in cluster composition within a  
257 cell type indicates changing transcriptional states. For example, most CD14<sup>+</sup> monocytes  
258 start from a single, dense cluster at the earliest time point which disintegrates concurrently  
259 with the appearance of three new clusters by 18 hours, with the major transition occurring  
260 between 4 and 6 hours post-blood draw (**Figure 5B**). A similar pattern was observed for  
261 CD4<sup>+</sup> memory T cells, CD8<sup>+</sup> memory T cells, and double-negative T cells. In contrast, the  
262 originating clusters of CD8<sup>+</sup> naive T cells and CD56<sup>low</sup> NK cells persisted throughout the time  
263 course despite the appearance of new clusters, and CD4<sup>+</sup> naive T cells exhibited some  
264 clusters persisting, some disappearing, and some appearing throughout the time course.  
265 Though the effects on different cell types resulted in different patterns of changing  
266 transcriptional profiles, for nearly all cell types changes were most apparent between the 4-  
267 hour and 6-hour time points (**Figure 5C**). This was true of cell types thought to be most  
268 responsive to environmental signals (e.g. monocytes) and for those thought to be quiescent  
269 (e.g. CD4<sup>+</sup> naive T). From these data we conclude that measurements obtained from PBMC

270 processed more than four hours after blood draw are increasingly at risk for pre-analytical  
271 artifacts.

272 Reflecting the changes in the global gene expression profile observed through unsupervised  
273 clustering, quantification of differentially expressed genes (DEG) relative to the 2-hour time  
274 point demonstrated a trend of an increasing number of DEG across cell types  
275 (**Supplemental Figure S6** and **Supplemental Table S4**). Once again, the number of  
276 changes was muted when PBMC processing started at 4 hours but emerged following the 6-  
277 hour time point. As expected, the specific transcriptional changes exhibiting time-dependent  
278 regulation were varied across cell types, but generally reflected an elevated activation status  
279 and included many shared transcripts, such as NF $\kappa$ B pathway genes (*NFKBIA*, *REL*,  
280 *TNFAIP3*), *CD83*, JUN family members, *HIF1A*, and *EIF1*. But coordinated regulation was  
281 also apparent, such as induction of *MAP3K8*, *IRF2BP2*, *TLE3*, and *MIR22HG* in both  
282 monocyte subsets and classical dendritic cells, and *SBDS* and *RBM38*, both RNA binding  
283 proteins, in all eight lymphocyte subsets.

284 Down-regulated genes exhibited similar trends. *DDX17*, *RIPOR2*, *TRAF3IP3*, *UCP2*, and  
285 *CD53* were diminished across many of the 14 cell types classified in the scRNA-seq data,  
286 while *DYNLL1*, *IFI16*, *POU2F2*, *CALM2*, *FYB1*, and *FGL2* were coordinately down-regulated  
287 in monocytes and dendritic cells in both experiments (**Supplemental Table S4**). We were  
288 particularly interested in the GIMAP (GTPase of the immunity-associated protein) family, a  
289 collection of eight sequence-related genes implicated in pro- and anti-apoptotic functions,  
290 primarily through studies in mouse T cells (Filén and Lahesmaa, 2010). *GIMAP4* and  
291 *GIMAP7* were down-regulated in nearly all cell types, with the exception of B cells and  
292 plasmacytoid dendritic cells, and *GIMAP1*, *GIMAP6*, and *GIMAP8* also exhibited decreasing  
293 expression in various cell types over the time course. In fact, *GIMAP4*, *GIMAP7*, and  
294 *GIMAP1* were among the genes that had the greatest drop in cellular percentage detection,  
295 irrespective of expression level. These data suggest survival or apoptosis may be key  
296 processes impacted by delayed PBMC processing.

297 To more comprehensively assess the changes occurring through the processing delay we  
298 performed pathway analysis by comparing the dominant cluster late in the time series and  
299 the dominant cluster early in the time series within a given cell type. For this analysis we  
300 selected CD14<sup>+</sup> monocytes and CD4<sup>+</sup> memory T cells as examples of myeloid and lymphoid  
301 cell types frequently interrogated in systems biology studies. Through this analysis, 18 of the  
302 top 22 pathways in CD14<sup>+</sup> monocytes and 23 of the top 26 pathways in CD4<sup>+</sup> memory T  
303 cells enriched in the late clusters included NF $\kappa$ B and/or JUN family members  
304 (**Supplemental Table S5**), indicating the emergence of an activated phenotype within these  
305 cell types. Also of note was the elaboration of pathways in both cell types related to HMGB1,  
306 hypoxia, Th17 activation, the NF $\kappa$ B pathway, IL-6 signaling, and apoptosis. Other pathways  
307 of note include two AHR pathways and TREM1 signaling induced in CD14<sup>+</sup> monocytes, and  
308 the mTOR and unfolded protein response in CD4<sup>+</sup> memory T cells. These pathways  
309 variously relate to survival and apoptosis, inflammation, and sensing of extracellular signals  
310 that potentially confound the native *ex vivo* biology. Though we cannot determine whether  
311 this shift in cluster occupancy and gene expression program represents a direct precursor-  
312 progeny relationship or whether it results from the outgrowth of a distinct rare subset of cells  
313 within each population, in either case it is clear that cells labeled as CD14<sup>+</sup> monocytes or  
314 CD4<sup>+</sup> memory T cells have undergone a time-dependent shift in their transcriptional profile.  
315 On the whole, the single-cell transcriptomics data demonstrate that cells are not “resting” in  
316 whole blood in the time between blood draw and PBMC processing, but rather are subject to  
317 and participating in a complex and active immune environment.

318



### 319 **Aligned -omics data powers hypothesis generation**

320 A unique advantage of these data is the ability to use them in cross-modal analyses. All data  
321 sets from a given donor were acquired from the same blood draw, eliminating subclinical  
322 immunity, circadian, diet, sleep, seasonal allergy, and a host of other environmental  
323 variables as confounders for intra-donor longitudinal analysis. In addition, targeted bulk  
324 transcriptomics and single-cell transcriptomics were performed from the same PBMC  
325 isolation per time point. Therefore, these single-cell RNA-seq data are ideal for  
326 deconvoluting the bulk transcriptomics of PBMC. One striking example is the T cell  
327 costimulatory molecule ICOS ligand (encoded by *ICOSLG*). Targeted bulk transcriptomics  
328 indicates a modest log<sub>2</sub> fold change of 1.7-2.3 across the six donors in Experiment 1  
329 (**Figure 6A**). Single-cell RNA sequencing, however, identifies induction of *ICOSLG* not only  
330 in myeloid cells such as conventional dendritic cells and plasmacytoid dendritic cells but  
331 also in B cells, with the highest expression in naive B cells (**Figure 6B**). Another interesting  
332 example is the secreted plasminogen activator urokinase, encoded by the gene *PLAU*,  
333 which was identified in the bulk transcriptomics data for a moderate induction by the 18-hour  
334 time point of Experiment 1. Single-cell analysis indicates the majority of this induction occurs  
335 in plasmacytoid dendritic cells, with little expression in other cell types. Urokinase is  
336 localized to the extracellular plasma membrane by association with PLAUR (Ellis and Danø,  
337 1991), which was likewise induced in bulk transcriptomics and shown to be expressed by  
338 monocytes and dendritic cells in our data, thus establishing a potential source and reservoir  
339 for potentiation of thrombolytic activity. These examples highlight the potential to explicitly  
340 decode bulk transcriptomic data sets of PBMC using our six matched longitudinal data sets.

341 More intriguing is the potential for synergy with cross-modal data. Whole blood left on the  
342 benchtop to be processed is a closed system and observations of concordant changes in a  
343 plasma protein and its corresponding transcript within a given cell type could be used to  
344 build testable hypotheses. To find such protein-transcript relationships, we filtered the list of  
345 proteins identified in Figure 3 for those having significant slopes over the entire time course,  
346 and determined the significance and direction of the slopes of the corresponding transcripts  
347 in each cell type. Though the number of anti-correlations outnumbered correlations, we  
348 focused on the proteins that were increasing over the time course and their positively  
349 correlated transcripts, as such a trend suggests *de novo* transcription, translation, and  
350 release resulting from activity occurring after blood draw. 137 proteins (11.8%) were  
351 significantly increased over the time course, of which approximately 25% were correlated  
352 with their corresponding transcript in at least one cell type and almost 11% in 3 or more cell  
353 types (**Supplemental Figure 7** and **Supplemental Table S6**). A limited number of protein-  
354 transcript pairs were increased in 9 or more of the 14 populations: PTPN1, NFKBIE, ELOA,  
355 TR, BACH1, RPS6KB1, and CD69. Conversely, the only decreased protein showing  
356 concordance with its transcript was APLP1, the strongest decreased protein in both  
357 experiments (**Figure 3**), and the correlation was found only with naïve B cells. Though the  
358 number of correlations overall was low, these data are consistent with the hypothesis that  
359 transcriptional activity *ex vivo* can lead to protein changes in the blood, with potential for  
360 cascading effects on bystander cells.

361 To consider these correlations in a more hypothesis-generating approach, we highlight two  
362 targets from this analysis. One, the TNF superfamily member LIGHT (encoded by  
363 *TNFSF14*), is a membrane and secreted ligand of the receptors HVEM, LTβR, and the  
364 soluble decoy DcR3. LIGHT potentiates T cell responses (Shaikh et al., 2001), has been  
365 reported in the setting of autoimmunity (Herro et al., 2015; Kotani et al., 2012), and is  
366 actively pursued as an anti-cancer therapy (Skeate et al., 2020). In our proteomics data,  
367 detectable LIGHT protein in the plasma fraction increased over the blood processing delay  
368 time course of both experiments (**Figure 7A**), resulting in a mean 2.49 fold increase at 18  
369 hours post-blood draw relative to 2 hours, the 20<sup>th</sup> most-induced protein in that comparison.  
370 Simultaneously, single-cell RNA sequencing showed the highest expression of LIGHT in

371 CD8<sup>+</sup> memory  $\alpha\beta$ T cells, NK cells, and double-negative T cells (likely comprised of  
372 CD4<sup>-</sup>CD8<sup>-</sup>  $\alpha\beta$ T and many  $\gamma\delta$ T cells) (**Figure 7C**). One of the receptors of LIGHT, HVEM  
373 (encoded by *TNFRSF14*), was broadly expressed but the other major receptor *LTBR* was  
374 restricted primarily to the myeloid compartment. At the same time, the decoy receptor DcR3  
375 (encoded by *TNFRSF6B*), capable of negatively regulating LIGHT (Wroblewski et al., 2003),  
376 was expressed primarily in lymphocytes, especially by double-negative T cells, which  
377 showed a trend toward increasing transcript levels concordant with increased levels of  
378 LIGHT plasma protein.

379 Another intriguing participant in the complex *ex vivo* blood environment is BACH1. BACH1 is  
380 a BTB/POZ transcription factor that heterodimerizes with small MAF proteins, leading to the  
381 regulation of oxidative stress gene targets bearing MAF recognition elements (Zhang et al.,  
382 2018). One such target, *HMOX1*, can be rapidly induced in monocytes by inflammatory  
383 stimuli (Yachie et al., 2003), and in fact we recognized induction and expression of *HMOX1*  
384 in CD14<sup>+</sup> and CD16<sup>+</sup> monocytes over the processing delay in our data (**Figure 7D**). BACH1  
385 was identified in our data sets by an increase in plasma protein levels (**Figure 7B**) and has  
386 previously been recognized as a regulator of *HMOX1* in human monocytes (Miyazaki et al.,  
387 2010). Consistent with the literature, we found the highest levels of *BACH1* transcript were  
388 expressed by monocytes, especially early after blood draw (**Figure 7D**). However, whereas  
389 nearly all other populations exhibited little to no expression of *BACH1* throughout the time  
390 course, both naive and non-naive B cells demonstrated a sharp induction of *BACH1* gene  
391 expression. A role for BACH1 in B cells has not been reported aside from potential  
392 redundancy with BACH2 during B cell development (Itoh-Nakadai et al., 2014). Thus, this  
393 observation represents a potential novel aspect of B cell biology under conditions of cellular  
394 stress and highlights the potential for these aligned data sets not only to reveal putative  
395 sources of activation-induced proteins, but to suggest possible cellular networks of  
396 communication.

397

## 398 Discussion

399 The human immune system can be biopsied through the collection of peripheral blood  
400 samples, making blood one of the most amenable human tissues for research studies. As a  
401 'sense and respond' organ, the immune system tailors its activity to a wide variety of subtle  
402 environmental cues, including *ex vivo* manipulation (Kelley et al., 1987). We used a  
403 longitudinal multi-modal approach to better understand artifacts from process variability in  
404 the study of whole blood components, providing three important contributions to the study of  
405 the human immune system. First, we showed that a delay in processing venipuncture blood  
406 samples has profound consequences on immune cells. Global effects on the native biology  
407 were identified in multiple assays, in all 10 donors of the study, and in all cell types we  
408 identified. Second, our multi-modal and longitudinal data sets constitute over 10 billion  
409 measurements of immune features in a closed system. These data can be mined for  
410 correlative gene-gene, gene-protein, ligand-receptor, and pathway interactions from which  
411 testable hypotheses can be derived. Furthermore, as these activities relate to potentially  
412 confounding pre-analytical artifacts, these data may enable a qualification of results from  
413 other studies that are subject to variable or sub-optimal processing conditions. Third, the 2-  
414 hour time points provide a large, high-quality, multi-modal data set of 10 human donors.  
415 These 2-hour data are temporally close to the *in vivo* biology, consisting of flow cytometry  
416 for major PBMC populations, single-cell RNA-sequencing of ~8000 quality cells per donor,  
417 targeted plasma proteomics of >1000 targets, and targeted bulk transcript analysis of >600  
418 targets on some donors. Thus, this resource provides various opportunities to investigate a  
419 multi-modal dataset derived from the components of freshly isolated and *ex vivo* aged  
420 human blood.

421 While the data from typical flow cytometry implied that commonly used cell surface proteins  
422 and the cells themselves are stable, both the targeted as well as whole transcriptome  
423 studies confirm large-scale changes in gene regulation. After an 18-hour delay in blood  
424 processing, transcriptional states in all cell types were fundamentally altered. Given the  
425 length of time, this might be expected. But more concerning are the changes occurring after  
426 just 4 and 6 hours post-draw, as evidenced by the changes in cellular state apparent  
427 through single-cell RNA-sequencing. Our findings implicate an up-regulation in inflammation  
428 and stress-activation (*NFKBIA*, *HIF1A*, *MAP3K8*), perhaps in response to deteriorating  
429 environmental conditions (Paardekooper et al., 2018; Rius et al., 2008). Under these  
430 conditions, the appearance of new clusters in tSNE visualization of gene expression data  
431 likely results from a large number of cells altering their gene expression profiles *ex vivo*  
432 rather than outgrowth of more rare pre-existing cells faithfully representing an *in vivo*  
433 activation state. If true, this fact underscores the challenges of using tSNE/UMAP  
434 classification of the data as an analysis mode, as cluster occupancy can be confounded by  
435 blood processing delay. The preferred alternative is to identify cellular identity on a per-cell  
436 basis first, and then compare the transcriptomic state of equivalent cell types based on the  
437 experimental variable (e.g. disease state); in this case the sample processing metadata,  
438 such as blood processing delay, must be carefully tracked and corrected for in the analytical  
439 model.

440 As predicted from our gene expression data, the plasma proteome exhibited dramatic  
441 changes in concert with the PBMC transcriptomics data. Correlation analysis targeted at  
442 identifying induction of transcripts coding for proteins that were coordinately increased  
443 revealed a number of interesting relationships, including some proteins known to be highly  
444 relevant to immunity (*PTPN1*, *NFKBIE*, *TR*, *BACH1*, *CD69*). However, it was apparent that  
445 anti-correlations were more prevalent than correlations, perhaps reflecting negative  
446 feedback in the presence of elevated protein signal, positive feed-forward when signal  
447 becomes limiting, or unlinked transcriptional regulation in the context of pre-formed protein.  
448 This result underscores the importance of studying protein pro-forms and post-translational  
449 regulation in order to establish explicit relationships between transcripts and their bioactive  
450 protein products.

451 Efforts to understand the effect of processing delay on various plasma and serum analytes  
452 have existed for some time (Ignjatovic et al., 2019; Ono et al., 1981), though typically limited  
453 to individual proteins or metabolites of known clinical interest. We have generated a unique  
454 public human proteomic data set, consisting of over 62,000 data points linked to PBMC flow  
455 cytometry and transcriptomics. The clearest signal in the targeted proteomics relates to  
456 platelet biology. This includes *CD40L*, *PDGF $\beta$* , *ANGPT1*, *STK4*, and others, supportive of a  
457 hypothesis of early and ongoing platelet activation which likely results in either direct and  
458 indirect protein release or increased platelet contamination in the plasma isolation. Blood for  
459 the proteomics studies was drawn into K2-EDTA tubes, the recommended anticoagulant for  
460 the assay and consistent with common practice. EDTA has previously been reported to elicit  
461 aggregation of platelets *in vitro* (Pegels et al., 1982). Of note, platelet aggregation in whole  
462 plasma is also not inhibited by heparin (Saba et al., 1984), such that the platelet response to  
463 blood draw or hemostasis may elicit or potentiate divergence from native biology. Therefore,  
464 our data suggests that some of the most severe changes in plasma proteomics result from  
465 the basic process of obtaining the sample. This activity has the potential for cascading  
466 effects on PBMC response, including by binding to and activating various leukocytes,  
467 serving as a physical mark of inflammation, and providing key signals such as *CD40* ligand,  
468 *CCL5*, and *CXCL4* (Gaertner and Massberg, 2019). These changes are exacerbated by  
469 time delay, thus highlighting the need for rapid and consistent processing.

470 In order to mitigate these confounding effects, the optimal solution is to process the samples  
471 consistently and with as little delay as possible. Previous studies on bulk PBMC have  
472 suggested that storing samples on ice may mitigate the effects of delayed blood processing

473 (Goods et al., 2018), and so to test this hypothesis we kept some of the whole blood  
474 samples at 4°C in a parallel experiment (data not shown). We found this mitigation effort to  
475 have mixed results, with an unexpected decrease in PBMC yield and hemolysis occurring in  
476 some samples. Therefore, our data indicates processing within 4 hours should become  
477 standard practice for assays using human blood components, particularly those employing  
478 deep transcriptional or proteomic profiling. This may not be possible in all cases. In these  
479 situations, our data provide a comprehensive set of landmarks to qualify the analysis for  
480 processing delay artifacts.

481 Embedded within the larger resource provided here, the 2-hour cytometry, proteomic, and  
482 transcriptomic data sets from 10 donors is a substantial resource in its own right, with  
483 minimal and controlled processing delay. The available public cytometry and single-cell  
484 RNA-seq data on human PBMC continue to grow in size and complexity, but to our  
485 knowledge no study integrates these two modalities with deep proteomics at this scale.  
486 Furthermore, though blood processing delay results in immune processes that may  
487 misrepresent or obscure the true biology being studied, we suspect that in many cases this  
488 'artifactual' biology echoes physiologic processes. This potential was highlighted by the  
489 broad down-regulation of multiple GIMAP family genes in many cell types. As these are  
490 known to relate to apoptosis in T cells (Filén and Lahesmaa, 2010), this observation is  
491 interesting. However, our data also opens the possibility of a similar role in myeloid cells, for  
492 which there is little existing data (Hellquist et al., 2007; Krücken et al., 1997). Therefore, the  
493 multi-modal data set is a substrate for generating testable hypotheses, so long as the  
494 limitations of an *ex vivo* artificial system are fully accepted. In particular, blood flow has  
495 ceased and cells may aggregate by settling, there is no regulation of blood gases, and  
496 temperature is well below physiologic range. When approached with an understanding of  
497 the experimental conditions employed, we believe these data can be used productively, for  
498 example in the study of transcriptional co-regulation, correlations among proteins and  
499 between proteins and genes, as well as novel associations of genes with cell types.

500 Recently, Massoni-Badosa *et al.* published a complementary effort on the effect of blood  
501 processing delay (Massoni-Badosa et al., 2020), with differences in the assays, cell  
502 numbers, and analyses performed. Our overall conclusions align with theirs, in the clear  
503 risks to data interpretation from processing delay and non-uniformity, though we did not  
504 recognize a global or cell type-specific reduction in transcript levels (**Supplemental Figure**  
505 **S4**). Nonetheless, the practical realities of obtaining clinical samples will ultimately dictate  
506 how and when they are processed, and the data generated should be analyzed with an  
507 appreciation for the unknown and/or variable amount of delay in processing. While this  
508 naturally applies to myriad ongoing and historical clinical studies, it is also keenly relevant to  
509 public health imperatives such as the SARS-CoV2 pandemic, for which process  
510 standardization may be outweighed by the benefit of sample acquisition. Accounting for  
511 such practicalities in a data-driven manner will provide broad and on-going benefit for  
512 improving the caliber of putative therapeutic targets, by lowering confidence in those subject  
513 to *ex vivo* regulation and thereby increasing confidence in the others. We hope these data  
514 will also spur a renewed focus on process standardization and optimization to ultimately  
515 improve data quality and physiologic relevance at the point of data generation. With over 1  
516 billion data points across several -omic platforms, our resource offers a rich data repository  
517 upon which to qualify existing data, benchmark and train subsequent studies, and derive  
518 novel hypotheses.

519

520 **Acknowledgements**

521 We are grateful to the individuals that provided biological material for this study. We  
522 appreciate the support of David Skibinski and Deric Khuat at Benaroya Research Institute.  
523 We thank Olink Proteomics for providing complimentary proteomic studies. We are  
524 especially thankful to all the members of the Allen Institute for Immunology and the facilities  
525 and operations teams at the Allen Institute who helped establish the productive environment  
526 in which this work was performed. We are grateful for the leadership and support of Allan  
527 Jones, President and CEO of the Allen Institute, and to the Allen Institute for Immunology for  
528 funding this study. The authors also wish to thank the Allen Institute founder, Paul G. Allen,  
529 for his vision, encouragement, and support.

530

531

532 **Author Contributions**

533 T.F.B., M.V.G., A.K.S., and H.B. conceived the study. M.V.G., A.K.S., H.B., E.S., T.C., and  
534 P.J.S. designed the experiments. A.K.S., A.T.H., K.H., N.K., K.C.B., T.S., and M.V.G.  
535 prepared the PBMC and plasma from whole blood. A.K.S. and A.T.H. performed the flow  
536 cytometry. A.K.S. and K.H. analyzed the flow cytometry data. E.S., C.L., and P.C.G.  
537 performed the single-cell RNA-sequencing. M.V.G., T.C., R.G., M.C., X.L., H.B., Z.T., and  
538 J.G. analyzed the single-cell RNA-sequencing data. M.V.G., M.C., and X.L. analyzed the  
539 bulk transcriptomics data and proteomics data. M.V.G. and A.K.S. selected candidates for  
540 cross-modal examination. E.J. built the web-accessible data browser. A.B. managed  
541 computational resources. J.H.B. provided human samples. T.F.B., P.J.S., T.R.T., X.L.,  
542 E.M.C, and P.M. provided direction and oversight. A.K.S. and T.C. wrote the manuscript,  
543 and all authors provided edits and comments to the manuscript.

544

545

546 **Declaration of Interests**

547 The authors have nothing to declare.

548

549

550

551 **Main figure and legends**

552 **Figure 1 - Flow cytometry suggests minimal effects from PBMC processing delay**

553 (A) Schematic of the designs of Experiment 1 and Experiment 2.

554 (B-F) Flow cytometry data from Experiment 2 were gated by traditional methods and the  
555 percent change in frequency was calculated for each population relative to the 2-hour PBMC  
556 processing time point. Because of technical artifacts, the 6-hour time points of donors A and  
557 B were excluded from analysis.

558 (B) Heat map of the median percent change in frequency across the donors in Experiment  
559 2.

560 (C-F) The percent change in frequency for selected populations in individual donors as a  
561 function of time of PBMC processing post-blood draw. Data points connected by a line are  
562 from sample aliquots derived of the same blood draw pool.

563 See also Supplemental Figures S1 and S2.

564

565 **Figure 2 - Bulk transcriptomics reveal profound changes in gene activity**

566 PBMC in Experiment 1 were prepared from whole blood at various times after blood draw  
567 and assayed by targeted transcriptomics in bulk using Nanostring nCounter.

568 (A) Targeted gene expression data colored by normalized counts relative to the mean of  
569 each gene across all samples. Genes (columns) are organized by unsupervised hierarchical  
570 clustering (dendrogram at top), and shown by time point (row groupings) post-blood draw  
571 and donor (rows). The boxes approximate subsets of gene that exhibit a pattern of inversion  
572 of expression between 8 and 18 hours post-blood draw (solid line) or an induction and re-  
573 normalization pattern (dashed line).

574 (B) Volcano plot of all targeted gene expression transcripts in samples from Experiment 1 at  
575 each time point compared to 2 hours post-draw. Adjusted p-value cutoffs of 0.05 (red) and  
576 0.01 (black), and log<sub>2</sub> fold changes of |1.5| (blue) are indicated by dashed lines. A selection  
577 of the highest fold change transcripts are labeled with their gene names.

578 (C-D) Data were analyzed using a generalized linear mixed effects model (details found in  
579 the Methods) and genes exhibiting significant change across the time course were selected  
580 for a similar and consistent pattern of up-regulation (C) or down-regulation (D). Shaded  
581 areas around the line indicate the 95% confidence interval. Changes are significant where  
582 the 95% CI does not include zero (dashed line).

583 See also Supplemental Figure S3 and Supplemental Table S1.

584

585 **Figure 3 - The plasma proteome reflects platelet and immune activation**

586 Plasma proteins were quantitated by a dual-antibody proximity extension assay (Olink).

587 (A) Data from all 10 donors were combined for analysis using a generalized linear mixed  
588 effects model (GLMEM) and only proteins exhibiting significant change are shown. Proteins  
589 (columns) are organized by unsupervised hierarchical clustering (dendrogram at top), shown

590 by time point (row groupings) post-blood draw and donor (rows), and colored by normalized  
591 change from the mean for each time point relative to the 2-hour time point.

592 (B-C) All proteins in Experiment 1 (B) and Experiment 2 (C) were plotted for fold change and  
593 adjusted p-value (Benjamini-Hochberg FDR) as calculated using a GLMEM model, and  
594 colored by time point.

595 (D) A selection of proteins showing the greatest fold change in combined analysis were  
596 plotted by time point and shaded regions indicate the 95% confidence interval. Where both  
597 experiments identified a significant fold change for a given protein but those fold changes  
598 differed between experiments according to the GLMEM model, two lines are shown (dashed  
599 for Experiment 1, dotted for Experiment 2); otherwise a single line (solid) representing data  
600 from both experiments is shown.

601 See also Supplemental Table S2.

602

### 603 **Figure 4 - PBMC exhibit severe time-dependent changes after blood draw**

604 The single-cell RNA-sequencing normalized gene expression matrices from each sample  
605 were identified for donor and time point and aggregated per experiment (Experiment 1:  
606 donors 2-7; Experiment 2: donors A-D). The multidimensional data was displayed in two  
607 dimensions using tSNE, colored as indicated. The data are overlaid in sequence with the  
608 latest time point (18hr) on top, obscuring some data points. Additional details can be found  
609 in the Methods.

610 (A-B) tSNE visualizations colored by cell type for Experiment 1 (A) and Experiment 2 (B).  
611 Individual cells were assigned a cell type label independently of clustering or tSNE  
612 visualization.

613 (C-F) tSNE visualizations colored by time point for Experiment 1 (C) and Experiment 2 (D).  
614 The tSNE maps in (C) and (D) were split out by donor for Experiment 1 (E) and Experiment  
615 2 (F).

616 See also Supplemental Figures S4 and S5, and Supplemental Table S3.

617

### 618 **Figure 5 - Individual cell types undergo distinct but analogous paths away from the 619 native transcriptional state over time**

620 Single-cell RNA-sequencing data from Experiment 2 was analyzed as in Figure 4 and the  
621 Methods.

622 (A-B) Data were isolated based on reference-based cell type, shown on the global tSNE  
623 map (A), and displayed separately based on time point using the same tSNE coordinates  
624 (B). Colors in (A) are assigned by cell type label and are arbitrary. Each color in (B)  
625 represents a different Louvain cluster.

626 (C) The number of cells occupying each cluster were enumerated and the counts (y-axis)  
627 plotted per cell type relative to the time after blood draw (x-axis) for each donor. Colors  
628 match the Louvain cluster colors in (B). Thicker lines represent the mean for all donors and  
629 thinner lines represent single donors. The 2-4 hour range highlighted in pink shows a period  
630 of apparent stability prior to more extreme divergence in cluster occupancy after 4 hours.

631 See also Supplemental Figure S6 and Supplemental Tables S3, S4, and S5.

632

633 **Figure 6 - Deconvolution of bulk transcriptomics by paired single-cell RNA-seq**  
634 **enables identification of cell-type-specific features**

635 (A) Transcripts from bulk transcriptomics data analyzed as in Figure 2 were selected based  
636 upon increasing expression over time and consistent dynamics across all six donors in  
637 Experiment 1. Charts show normalized counts for hours since blood draw for the individual  
638 donors, indicated by color.

639 (B) Single-cell RNA-seq data (analyzed as in Figure 4) from all 10 donors in both  
640 experiments were queried for transcripts selected in (A) and plotted by cell type. Charts  
641 show the normalized and scaled RNA count (y-axis) for hours since blood draw (x-axis).  
642 Individual donors are indicated by color.

643 See also Supplemental Tables S1 and S4.

644

645 **Figure 7 - Multi-modal analysis reveals unanticipated protein-gene-cell relationships**

646 (A-B) Plasma proteins from proteomics data analyzed as in Figure 3 were selected based  
647 upon increasing expression over time and across all 10 donors in both experiments.  
648 Normalized protein expression (y-axis) over time since blood draw (x-axis) is shown, with  
649 individual donors indicated by color.

650 (C-D) Single-cell RNA-seq data (analyzed as in Figure 4) from all 10 donors in both  
651 experiments were queried for transcripts encoding TNFSF14 and its receptors (C) or  
652 BACH1 and a selection of its transcriptional targets related to oxidative stress (D), and  
653 plotted by cell type. Charts show the normalized and scaled RNA count (y-axis) for hours  
654 since blood draw (x-axis). Individual donors are indicated by color.

655 See also Supplemental Figure S7 and Supplemental Table S8.

656

657



658 **Supplemental tables**

659 **Supplemental Table S1, Related to Figure 2, Figure 6, and Supplemental Figure S3 –**  
660 **Nanostring bulk transcriptomics**

661 **Supplemental Table S2, Related to Figure 3, Supplemental Figure S7, and**  
662 **Supplemental Table S8 – Olink proteomics**

663 **Supplemental Table S3, Related to Figure 4 and Supplemental Figure S4 – single-cell**  
664 **RNA sequencing, per-cell metrics and metadata**

665 **Supplemental Table S4, Related to Figure 5, Figure 6, and Supplemental Figure S5 –**  
666 **single-cell RNA sequencing, differentially expressed genes relative to the 2-hour time**  
667 **point, by cell type**

668 **Supplemental Table S5, Related to Figure 5 – single-cell RNA sequencing, pathway**  
669 **analysis**

670 **Supplemental Table S6, Related to Supplemental Figure S7, and Supplemental Tables**  
671 **S2 and S4 – Protein-transcript correlations**

672 **Supplemental Table S7 – donor information**

673 **Supplemental Table S8, Related to Figure 5 and Supplemental Figure S5 – single-cell**  
674 **RNA sequencing, differentially expressed genes by cell type classification**

675

676

677

678 **Supplemental figure and legends**

679 **Supplemental Figure S1, Related to Figure 1 – PBMC yield and viability, flow**  
680 **cytometry gating**

681 (A-B) PBMC were isolated from whole blood by ficoll separation at the indicated time points  
682 after blood draw and assessed for yield (A) and viability (B).

683 (C-D)  $5 \times 10^6$  PBMC isolated as in panels A-B and frozen in liquid nitrogen were thawed and  
684 assessed for yield (C) and viability (D) prior to downstream assays. “% recovery” was  
685 calculated as the recovery of live PBMC divided by  $5 \times 10^6$ .

686 (E-F) Flow cytometry gating schemes for Experiment 1 (E) and Experiment 2 (F). Orange  
687 labels indicate gates used to determine population frequencies. The gate labeled “cleanup”  
688 in Experiment 2 was used to remove dye aggregates.

689

690 **Supplemental Figure S2, Related to Figure 1 – Flow cytometry frequencies**

691 Flow cytometry data were gated by traditional methods for major PBMC populations, as in  
692 Supplemental Figure 1. Because of technical artifacts, the 6-hour time points of donors A  
693 and B were excluded from analysis.

694 (A-B) The percent change in frequency was calculated for each population relative to the 2-  
695 hour PBMC processing time point and population medians were calculated. Data are  
696 displayed as a heat map for Experiment 1 (A) or Experiment 2 (B).

697 (C-D) Population frequencies are shown per donor as a percent of live cells in Experiment 1  
698 (C) or percent of CD45<sup>+</sup> cells in Experiment 2 (D).

699

700 **Supplemental Figure S3, Related to Figure 2 and Supplemental Table S1 – Nanostring**  
701 **bulk transcriptomics principle components analysis**

702 PBMC in Experiment 1 were prepared from whole blood at various times after blood draw  
703 and assayed by targeted transcriptomics in bulk using Nanostring nCounter. The normalized  
704 counts were analyzed by principle components analysis and colored by donor (A) or by time  
705 point (B).

706

707 **Supplemental Figure S4, Related to Figure 4 and Supplemental Table S3 – Single-cell**  
708 **RNA sequencing, technical metrics**

709 Single-cell RNA-sequencing technical metrics were compiled for Experiment 1 (A-D) and  
710 Experiment 2 (E-H) and categorized by cell type, as assigned by Seurat-based reference  
711 alignment (see Methods for details).

712 The number of quality singlets (A, E), mean mitochondrial DNA (B, F), features (C, G), and  
713 UMI (D, H) were quantified per cell type and colored by donor.

714

715 **Supplemental Figure S5, Related to Figure 4 and Supplemental Table S3 – Single-cell**  
716 **RNA sequencing, tSNE individually by time**

717 The single-cell RNA-sequencing normalized gene expression matrices from each sample  
718 were identified for donor and time point and aggregated per experiment. The  
719 multidimensional data was displayed in two dimensions using tSNE, split out by time post-  
720 blood draw for Experiment 1 (A) and Experiment 2 (B), and colored by Louvain cluster.  
721 Additional details can be found in the Methods.

722

723 **Supplemental Figure S6, Related to Figure 5 and Supplemental Tables S3, S4, and S5**  
724 **– Single-cell RNA sequencing, differentially expressed genes**

725 Differential expression in genes at each time point relative to 2 hours post-draw are  
726 represented as log<sub>2</sub> fold change (x-axis) vs. log<sub>10</sub> adjusted p-value (y-axis) (see the  
727 Methods for details). Blue dashed lines indicate log<sub>2</sub> fold change of |1.1| and red dashed  
728 lines indicate adjusted p-values of 0.05 and 0.01. For visualization purposes, adjusted p-  
729 values at zero are set to the non-zero minimum of all other adjusted p-values and divided by  
730 two. Cell types not represented did not have differentially expressed genes (after p-value  
731 adjustment).

732 (A-C) Differential expression in healthy (A) and SLE (B) donors of Experiment 1 and healthy  
733 donors of Experiment 2 (C). The legend in panel (A) also applies to panel (B).

734

735 **Supplemental Figure S7, Related to Figure 7, and Supplemental Tables S2, S4, and S6**  
736 **– Protein-transcript correlations**

737 Proteins identified in Figure 3 were filtered for significance and directionality across the  
738 entire time course and the corresponding transcripts were similarly assessed by cell type.

739 (A) Proteins of increasing and decreasing abundance were scored for correlation (black)  
740 with the corresponding transcript in a least one cell type. Protein-transcript pairs that were  
741 not correlated (gray) could be anti-correlated, not significant, or have missing transcript data  
742 (for example, from drop-outs in the single-cell RNA-sequencing data).

743 (B) To assess whether protein-transcript correlations were common to many cell types or  
744 typically restricted to a limited number of cell types, increasing (orange) and decreasing  
745 (purple) proteins were scored for correlation (solid color) or anti-correlation (hashed color)  
746 with their corresponding transcript in each cell type and the count of each correlation was  
747 tallied across the cell types. Because proteins are scored if they are correlated or anti-  
748 correlated in at least one of fourteen populations, a single protein could be scored as both.

749 (C-D) To assess whether specific cell types had a propensity or bias in their correlations,  
750 correlated (solid color), anti-correlated (hashed color), and not correlated proteins (gray)  
751 were tallied by cell type for proteins increased (C, orange) and decreased (D, purple) over  
752 the time course.

753

754 **Supplemental Figure S8, Related to Supplemental Tables S2 and S4 – Analysis of**  
755 **technical variance in proteomics and single-cell RNA-sequencing assays**

756 (A-B) To assess the technical variance of the plasma protein assay, plasma samples from  
757 six donors from both 2 hours and 6 hours post-blood draw were compared across three  
758 different assay plates. The data are shown as MA plots (A) and the distributions of fold  
759 changes (B) in plate-to-plate comparisons. The red dash lines indicate the log<sub>2</sub> fold  
760 change cutoff (0.585) used in the study.

761 (C-D) To assess the technical variance of the single-cell RNA-sequencing assay, replicate  
762 aliquots of PBMC from a non-study sample were assayed in three different wells (see  
763 Methods/Single Cell Transcriptomics). Average transcript intensities were calculated from  
764 cells with non-zero counts and fold changes between replicates were calculated. The data  
765 are shown as MA plots (A) and the distributions of fold changes (B) in well-to-well  
766 comparisons. The red dash lines indicate the log<sub>2</sub> fold change cutoff (1.1) used in the  
767 study.

768

769

## 770 **Methods**

### 771 **Resource availability**

### 772 **Lead Contact**

773 Further information and requests for resources and reagents should be directed to and will  
774 be fulfilled by the Lead Contact, Adam Savage (adam.savage@alleninstitute.org).

### 775 **Materials Availability**

776 No materials were generated for this study.

### 777 **Data and Code Availability**

778 Flow cytometry .fcs data files are available on request. Nanostring bulk transcriptomics and  
779 Olink proteomics data are provided in **Supplemental Tables S1 and S2**, respectively. All  
780 single-cell RNA-sequencing data have been deposited at GEO (GSE156989).  
781 Transcriptomics and proteomics data are available for exploration at  
782 <http://bloodprocessingdelay.allenimmunology.org>.

### 783 **Methods Details**

#### 784 **Donors and sample handling**

785 Blood samples were obtained from healthy (no diagnosis of disease, donors 2-4 and A-D)  
786 and non-matched donors with systemic lupus erythematosus (SLE, donors 5-7)  
787 (**Supplemental Table S7**), from the Benaroya Research Institute (Seattle, WA) or  
788 Bloodworks Northwest (Seattle, WA) through protocols approved by the relevant institutional  
789 review boards. Blood was drawn into BD NaHeparin vacutainer tubes (for PBMC; BD  
790 #367874) or K2EDTA vacutainer tubes (for plasma; BD #367863) and, upon arrival at the  
791 processing lab, all NaHeparin tubes for each donor were pooled into a sterile plastic  
792 receptacle to establish one common pool for all time points and stored at room temperature  
793 for the duration. PBMC isolation and plasma processing was started at 2, 4, 6, 8, and 18  
794 hours post-draw (Experiment 1) or 2, 4, 6, 10, 14, and 18 hours post-draw (Experiment 2).  
795 For Experiment 1, each donor sample was processed by a single operator on a separate  
796 day, and thawed PBMC were assayed by cytometry and single-cell RNA-sequencing in  
797 three batches (donor 2, donors 3-4, and donors 5-7). For Experiment 2, all four donors were  
798 processed on the same day by a team of operators, and thawed PBMC were assayed by  
799 cytometry and single-cell RNA-sequencing in one batch. Due to a PBMC processing error in  
800 Experiment 2, flow cytometry and single-cell RNA-sequencing was not available for the 6-  
801 hour time point from donors A and B. This resulted in 30 samples of bulk transcriptomics  
802 (Experiment 1 only), 52 samples of flow cytometry and single-cell RNA-sequencing, and 54  
803 samples of plasma proteomics data.

804 For PBMC isolation, at each time point the pool of blood was gently swirled until fully mixed,  
805 about 30 times, and a volume of blood was removed and combined with an equivalent  
806 volume of room temperature PBS (ThermoFisher #14190235). PBMC were isolated using  
807 one or more Leucosep tubes (Greiner Bio-One #227290) loaded with 15 mL of Ficoll  
808 Premium (GE Healthcare #17-5442-03) to which a 3 mL cushion of PBS had been slowly  
809 added on top of the Leucosep barrier. The 24-30 mL diluted whole blood was slowly added  
810 to the tube and spun at 1000xg for 10 minutes at 20°C with no brake. PBMC were recovered  
811 from the Leucosep tube by quickly pouring all volume above the barrier into a sterile 50 mL  
812 conical tube. 15 mL cold PBS+0.2% BSA (Sigma #A9576; "PBS+BSA") was added and the  
813 cells were pelleted at 400xg for 5-10 minutes at 4-10°C. The supernatant was quickly  
814 decanted, the pellet dispersed by flicking the tube, and the cells washed with 25-50 mL cold

815 PBS+BSA. Cell pellets were combined, if applicable, the cells were pelleted as before,  
816 supernatant quickly decanted, and residual volume was carefully aspirated. The PBMC were  
817 resuspended in 1 mL cold PBS+BSA per 15 mL whole blood processed and counted with a  
818 ViCell (Beckman Coulter) using VersaLyse reagent (Beckman Coulter #A09777) or with a  
819 Cellometer Spectrum (Nexcelom) using Acridine Orange/Propidium Iodide solution. PBMC  
820 were cryopreserved in Cryostor10 (StemCell Technologies #07930) or 90% FBS  
821 (ThermoFisher #10438026) / 10% DMSO (Fisher Scientific #D12345) at  $5 \times 10^6$  cells/mL by  
822 slow freezing in a Coolcell LX (VWR #75779-720) overnight in a  $-80^\circ\text{C}$  freezer followed by  
823 transfer to liquid nitrogen.

824 For plasma isolation, the K2-EDTA source tube was gently inverted 10 times and the  
825 appropriate volume of whole blood was extracted using an 18-gauge needle and syringe,  
826 and transferred to a similar plastic tube with no additives (Greiner Bio-One #456085). The  
827 blood was centrifuged at 2000xg for 15 minutes at  $20^\circ\text{C}$  with a brake of 1, and 80-90% of  
828 the plasma supernatant was removed by careful pipetting for immediate freezing at  $-80^\circ\text{C}$ .  
829 Plasma was assayed after the first freeze/thaw.

### 830 **Flow cytometry**

831 PBMCs were removed from liquid nitrogen storage and immediately thawed in a  $37^\circ\text{C}$  water  
832 bath. Cells were diluted dropwise with  $37^\circ\text{C}$  AIM V media (Thermo Fisher Scientific  
833 #12055091) up to a final volume of 10 mL. A single wash was performed in 10 mL of  
834 PBS+BSA, pelleting cells at 400xg for 5-10 minutes at  $4-10^\circ\text{C}$ . PBMCs were resuspended 2  
835 mL in PBS+BSA, counted on a ViCell or Cellometer Spectrum, as above, and  $1 \times 10^6$  cells  
836 were incubated sequentially or together with Human TruStain FcX (BioLegend #422302) and  
837 Fixable Viability Stain 510 (BD #564406), on ice and according to manufacturer's  
838 instructions. Cells were washed with PBS+BSA and stained with a master mix cocktail of  
839 antibodies on ice for 25-30 minutes. Experiment 1 and Experiment 2 were assayed by flow  
840 cytometry using a 12-target panel and a 24-target panel, respectively (Key Resources  
841 Table). Cells were washed with PBS+BSA and fixed with 4% paraformaldehyde (Electron  
842 Microscopy Sciences #15713) for 12-15 minutes at room temperature. Cells were washed  
843 with PBS+BSA, resuspended in PBS+BSA, and collected on a BD Symphony cytometer.  
844 After compensation, cytometry data was pre-processed to remove unrepresentative events  
845 due to instrument fluidics variability (time gating), to exclude doublets (by FSC-H and FSC-  
846 W), and to exclude cells exhibiting membrane permeability (live/dead gating) prior to  
847 quantification using BD FlowJo software. Gating examples are provided in **Supplemental**  
848 **Figure 1E-F**. The percent change in frequency was calculated per cell type to quantify the  
849 observed cell frequency changes along the variable of time, along with the corresponding  
850 change in median frequencies across all samples.

### 851 **Bulk transcriptomics**

852 For Experiment 1,  $2 \times 10^5$  fresh PBMC were pelleted, resuspended in Qiagen buffer RLT  
853 (Qiagen #79216), and quick frozen immediately at  $-80^\circ\text{C}$  for assay on the Nanostring  
854 nCounter platform, performed as a fee-for-service by Nanostring using their standard  
855 protocols for the nCounter Gene Expression – Hs Immunology v2 CodeSet assay.

### 856 **Proteomics**

857 Plasma samples were assayed using the Olink Proximity Extension assay, run on the  
858 Fluidigm Biomark system. They were submitted to Olink Boston (Experiment 1) or Olink  
859 Sweden (Experiment 2). Patient samples were distributed evenly across plates, and all  
860 timepoints per patient were run on the same plate, with randomized well locations. Samples  
861 were assayed using the Olink Discovery Assay which encompasses all proteins across 13  
862 panels (Cardiometabolic (V.3603), Cardiovascular II (V.5006), Cardiovascular III (V.6113),

863 Cell Regulation (V.3701), Development (V.3512), Immune Response (V.3202), Inflammation  
864 (V.3021), Metabolism (V.3402), Neuro Exploratory (V.3901), Neurology (V.8012), Oncology  
865 II (V.7004), Oncology III (V.4001), Organ Damage (V.3311)). Data were normalized by Olink  
866 using an Olink-provided plasma plate bridging control, three positive controls, and three  
867 background controls. Samples reported below the stated Limit of Detection were removed  
868 from our analysis.

### 869 **Single Cell Transcriptomics**

870 PBMC were thawed as described in the Methods for flow cytometry and the same vial of  
871 cells was used for flow cytometry and single-cell RNA-sequencing. Single-cell RNA-seq  
872 libraries were generated using the 10x Genomics Chromium 3' Single Cell Gene Expression  
873 assay (#1000075 or #1000121) and Chromium Controller Instrument according to the  
874 manufacturer's published protocol. 16,000 cells from each PBMC sample were loaded into a  
875 separate Chromium Single Cell Chip B (10x Genomics #1000073) well targeting a recovery  
876 of 10,000 cells. Gel Beads-in-emulsion (GEMs) were then generated using the 10x  
877 Chromium Controller. The resulting GEM generation products were then transferred to strip  
878 tubes and reverse transcribed on a C1000 Touch Thermal Cycler programmed at 53°C for  
879 45 minutes, 85°C for 5 minutes, and then held at 4°C. Following the reverse transcription  
880 incubation, GEMs were broken and the pooled single-stranded cDNA fractions were  
881 recovered using Silane magnetic beads (Dynabeads MyOne SILANE #37002D). Purified  
882 barcoded, full-length cDNA was then amplified with a C1000 Touch Thermal Cycler  
883 programmed at 98°C for 3 minutes, 11 cycles of (98°C for 15 seconds, 63°C for 20 seconds,  
884 72°C for 1 minute), 72°C for 1 minute, and then held at 4°C. Amplified cDNA was purified  
885 using SPRIselect magnetic beads (Beckman Coulter #22667) and a 1:10 dilution of the  
886 resulting cDNA was run on a Bioanalyzer High Sensitivity DNA chip (Agilent Technologies  
887 #5067-4626) to assess cDNA quality and yield. A quarter of the cDNA sample (10 ul) was  
888 used as input for library preparation. Amplified cDNA was fragmented, end-repaired, and A-  
889 tailed in a single incubation protocol on a C1000 Touch Thermal Cycler programmed at 4°C  
890 start, 32°C for 5 minutes, 65°C for 30 minutes, and then held at 4°C. Fragmented and A-  
891 tailed cDNA was purified by performing a dual-sided size-selection using SPRIselect  
892 magnetic beads (Beckman Coulter #22667). A partial TruSeq Read 2 primer sequence was  
893 then ligated to the fragmented and A-tailed end of cDNA molecules via an incubation of  
894 20°C for 15 minutes on a C1000 Touch Thermal Cycler. The ligation reaction was cleaned  
895 using SPRIselect magnetic beads (Beckman Coulter #22667). PCR was performed to  
896 amplify the library and add the P5 and indexed P7 ends (10x Genomics #1000084), using a  
897 C1000 Touch Thermal Cycler programmed at 98°C for 45 seconds, 13 cycles of (98°C for  
898 20 seconds, 54°C for 30 seconds, 72°C for 20 seconds), 72°C for 1 minute, and then held at  
899 4°C. PCR products were purified by performing a dual-sided size-selection using SPRIselect  
900 magnetic beads (Beckman Coulter #22667) to produce final, sequencing-ready libraries.  
901 Final libraries were quantified using Picogreen and their quality was assessed via capillary  
902 electrophoresis using the Agilent Fragment Analyzer HS DNA fragment kit and/or Agilent  
903 Bioanalyzer High Sensitivity chips. Libraries were sequenced on the Illumina NovaSeq  
904 platform using S4 flow cells. Read lengths were 28bp read1, 8bp i7 index read, 91bp read2.

### 905 **Computational Analysis**

#### 906 **Nanostring model**

907 The Nanostring platform was run on all timepoints from Experiment 1 (Subjects 2-7,  
908 Timepoints 2, 4, 6, 8, 18 hours). The data were normalized to NanoString-provided control  
909 genes using the NanoStringNorm package (Waggott et al., 2012) and log-transformed (base  
910 2). Genes with zero expression in more than 20% of samples were removed from further  
911 analysis. Generalized linear mixed effect models (GLMEM) were fit to the expression data of  
912 individual genes, controlling for the fixed effects of sex (male vs. female) and binary

913 processing timepoints (4, 6, 8, 18 hours vs. 2-hour baseline), and subject-level random  
914 effects to account for individuals' inherent variability, using Gaussian family distribution. All  
915 the models were built in the R library glmmTWB version 1.0.1. The log<sub>2</sub> fold change from  
916 the baseline was evaluated by the corresponding time-related effect estimates. Multiple  
917 tests correction was applied to the p-values to control the false discovery rate (FDR) using  
918 Benjamini & Hochberg procedure (Benjamini and Hochberg, 1995).

## 919 **Proteomics**

### 920 **Proteomics Model**

921 Plasma from Experiment 1 and Experiment 2 were submitted to Olink (Uppsala, Sweden) in  
922 one batch per experiment. All 2-hour samples from Experiment 1 were included in both  
923 batches as bridging controls. Proteins below the reported Limit of Detection or that exhibited  
924 more than 20% missingness or ranked in the lowest 20% among all proteins in expression  
925 (as defined by the sum of the corresponding normalized expression values) were  
926 disregarded from further evaluation. As recommended by Olink, expression values for each  
927 protein in Experiment 2 were subtracted by the corresponding protein-specific normalization  
928 factor, which was the median of the corresponding pair-wise expression difference as  
929 measured on the bridging controls between the two experiments.

930 A protein-specific GLMEM was fit to each normalized protein, controlling for the fixed effects  
931 of sex (male vs. female), age (35-55 years old vs. 25-35 years old), disease status (SLE vs.  
932 healthy), study id (Experiment 2 vs. Experiment 1) and continuous processing delay (time  
933 point), and accounting for an individual's inherent variability through subject-level random  
934 effects. To capture the study specific non-linear temporal effects, the cubic, quadratic or  
935 linear effect of processing time and its interaction with study id were evaluated in a step-  
936 down approach using a likelihood ratio test. The dispersion was modeled as a function of  
937 plate, disease status and study id to allow non-constant variability. All the models were built  
938 in the R library glmmTWB version 1.0.1. We reported the average log<sub>2</sub> fold-change in  
939 proteomic expression between later processing time points and the first time point (2-hour)  
940 along with the corresponding two-sided 95% CIs. Wald tests were conducted to assess  
941 significance of the change estimates and associated p-values. When a significant difference  
942 was found in the change estimates between the two studies due to experimental conditions  
943 unaccounted for, we reported study-specific change estimates. Multiple tests correction was  
944 applied to the p-values to control the FDR using Benjamini & Hochberg procedure  
945 (Benjamini and Hochberg, 1995).

### 946 **Proteomics Technical Precision**

947 Plasma samples from the six donors in Experiment 1 from the 2-hour and 6-hour post-blood  
948 draw time points were analyzed by Olink on three separate plates to determine the technical  
949 variance of the assay. The obtained abundance of each protein was corrected for plate  
950 effects by aligning the corresponding medians. The average and the log<sub>2</sub> fold change of  
951 protein abundance were calculated between any two plates and summarized in  
952 **Supplemental Figure 8**.

## 953 **Single-Cell Transcriptomics**

### 954 **scRNA-seq Pre-processing**

955 Binary Base Call (BCL) files were demultiplexed using the mkfastq function in the 10x Cell  
956 Ranger software (version 3.1.0), producing fastq files. Fastq files were then checked for  
957 quality (FastQC version 0.11.3) and run through the 10x Cell Ranger alignment function (cell  
958 ranger count) against the human reference annotation (Ensembl GRCh38). Mapping was  
959 performed using default parameters. Additional information about Cell Ranger can be found

960 at <https://support.10xgenomics.com/single-cell-gene-expression/software>. Upon completion,  
961 Cell Ranger produced an output directory per file that contains the following: bam file (binary  
962 alignment file), HDF5 file (Hierarchical Data Format) with all reads, HDF file containing just  
963 the filtered reads, summary report (html and csv), cloupe.cloupe (a file for the 10x Loupe  
964 visual browser). HDF5 files (filtered) were then uploaded into the R statistical programming  
965 language (version 3.6.0) using the Seurat package (version 3.0) where normalization,  
966 scaling, integration and reference-based label transfer was performed for cell  
967 typing/classification.

#### 968 **scRNA-seq Cell Classification**

969 Individual HDF5 files were loaded into the R statistical programming language (version  
970 3.6.0) using Bioconductor (version 3.1.0) and the Seurat package (version 3.1.5). For  
971 simplicity, sample names were captured as a list in R and iteratively processed within a loop  
972 (refer to <https://satijalab.org/seurat/> for more information). Within the loop, samples were  
973 normalized with the NormalizeData function followed by the FindVariableFeatures function  
974 with parameters: vst selection method and 2000 features. Label transfer was performed  
975 using previously published procedures (Stuart et al., 2019). Data was labeled with the  
976 Seurat reference dataset and checked for expected DEG by cell type (**Supplemental Table  
977 S8**). Labeling included the FindTransferAnchors and TransferData functions performed in  
978 the Seurat package. Labeling was performed in specified sequence where information  
979 acquired from the previous labeling was accumulated then set as anchors for the next  
980 sample, looping by time point across patients. The time point to time point variation first  
981 observed within the Nanostring data was used as the basis for this labeling strategy.

982 After label transfer was complete, we calculated read depth, mitochondrial percentage, and  
983 number of UMIs per sample. Despite normalization being performed during the label transfer  
984 process, the raw counts were stored with cell labels. After labeling and metrics were  
985 recorded, samples were merged together in Seurat using the merge function. The merged  
986 data structure was normalized (using NormalizeData and FindVariableFeatures functions)  
987 and then saved as an RDS for further analysis. For confirmation of cell types, we used the  
988 FindMarkers function (Seurat) and the MAST package to identify DEGs for each identified  
989 cell type against all other cell types. Unsupervised cell clustering was also performed  
990 separately for Experiment 1 and Experiment 2 using the Louvain / KNN-based method in the  
991 Seurat package.

#### 992 **scRNA-seq Differential Gene Expression Analysis**

993 Differential expression analysis from later timepoints compared to two hours was conducted  
994 on a per reference-based cell type basis and for selected timepoints on a per Louvain-  
995 cluster basis using the MAST package (<https://pubmed.ncbi.nlm.nih.gov/26653891/>) and the  
996 FindMarkers function from the Seurat package (version 3.1.5). Because they were  
997 sequenced in different batches, differential expression was run separately for Experiment 1  
998 Healthy Donors, Experiment 1 SLE Donors, and Experiment 2 Healthy Donors.

#### 999 **scRNA-seq Pathway Analysis**

1000 Pathway analysis was performed on single-cell transcriptomics data from Experiment 2.  
1001 Individual cells were labeled by cell type and clustered as indicated in Methods/Single-Cell  
1002 Transcriptomics/Cell Classification. As an example of pathway analysis, two clusters  
1003 exhibiting extreme and inverse time-dependent bias (e.g. present in a cell type at 2 hours  
1004 but not present for the same cell type at 18 hours, and vice versa) were selected and the  
1005 corresponding data was submitted to Ingenuity Pathway Analysis (Qiagen, release: Summer  
1006 2020) using log<sub>2</sub> fold change values and adjusted p-values calculated by differential gene  
1007 expression analysis. The clusters selected for analysis were (colors as shown in **Figure 5B**):



1008 magenta (“early”) and teal (“late”) from CD14+ Monocytes and, separately, pink (“early”) and  
1009 brown (“late”) from CD4+ memory T cells.

1010 **scRNA-seq Technical Precision**

1011 Three replicate aliquots of a non-study PBMC sample (Bloodworks Northwest, Seattle,  
1012 WA) were analyzed in three wells on a Chromium Single Cell Chip B to study the precision  
1013 of the technology. The average transcript intensity was calculated for each well from cells  
1014 detected in the well and having nonzero counts. The obtained transcript intensity was  
1015 corrected for well effects by aligning the corresponding medians of all transcripts. The  
1016 average and the log<sub>2</sub> fold change of transcript intensity were calculated between any two  
1017 wells and summarized in **Supplemental Figure 8**.

1018 **Protein-transcript correlations**

1019 A total of 233 plasma proteins showed significant changes in any time point, of which 184  
1020 were unambiguously mapped to a single gene and detected by scRNA. The changes of  
1021 these 184 proteins were then modeled as linear functions of time (linear mixed models, fixed  
1022 effects: intercept and slope, random effects: intercept and slope). A total of 159 proteins  
1023 showed significant slope for time ( $p < 0.05$  after multi-testing correction). Afterwards the  
1024 corresponding RNA expressions of the 159 proteins were modeled as linear functions of the  
1025 proteins for each cell type (linear mixed models, fixed effects: intercept and slope, random  
1026 effects: intercept and slope). The  $p$  values for the slope were then adjusted for both the  
1027 number of proteins (159) and the number of cell types (14) and thus a total of 2226 tests.  
1028 RNA and protein were considered as strongly correlated or anticorrelated if the adjusted  $p <$   
1029  $0.05$ . Benjamini & Hochberg procedure (Benjamini and Hochberg, 1995) was used for multi-  
1030 testing correction.

1031 **References**

- 1032 Andrae, J., Gallini, R., and Betsholtz, C. (2008). Role of platelet-derived growth factors in  
1033 physiology and medicine. *Genes Dev.* 22, 1276–1312.
- 1034 Assarsson, E., Lundberg, M., Holmquist, G., Björkesten, J., Thorsen, S.B., Ekman, D.,  
1035 Eriksson, A., Dickens, E.R., Ohlsson, S., Edfeldt, G., et al. (2014). Homogenous 96-plex  
1036 PEA immunoassay exhibiting high sensitivity, specificity, and excellent scalability. *PLoS*  
1037 *One* 9.
- 1038 Baechler, E.C., Batliwalla, F.M., Karypis, G., Gaffney, P.M., Moser, K., Ortmann, W.A.,  
1039 Espe, K.J., Balasubramanian, S., Hughes, K.M., Chan, J.P., et al. (2004). Expression  
1040 levels for many genes in human peripheral blood cells are highly sensitive to ex vivo  
1041 incubation. *Genes Immun.* 5, 347–353.
- 1042 Barnes, M.G., Grom, A.A., Griffin, T.A., Colbert, R.A., and Thompson, S.D. (2010). Gene  
1043 Expression Profiles from Peripheral Blood Mononuclear Cells Are Sensitive to Short  
1044 Processing Delays. *Biopreserv. Biobank.* 8, 153–162.
- 1045 Beck, F., Geiger, J., Gambaryan, S., Solari, F.A., Dell'aica, M., Lorocho, S., Mattheij, N.J.,  
1046 Mindukshev, I., Pötz, O., Jurk, K., et al. (2017). Temporal quantitative phosphoproteomics  
1047 of ADP stimulation reveals novel central nodes in platelet activation and inhibition. *Blood*  
1048 129, e1–e12.
- 1049 Benjamini, Y., and Hochberg, Y. (1995). Controlling the False Discovery Rate: A Practical  
1050 and Powerful Approach to Multiple Testing. *J. R. Stat. Soc. Ser. B* 57, 289–300.
- 1051 Cho, Y., Jang, Y., Yang, Y.D., Lee, C.H., Lee, Y., and Oh, U. (2010). TRPM8 mediates  
1052 cold and menthol allergies associated with mast cell activation. *Cell Calcium* 48, 202–208.
- 1053 Dvinge, H., Ries, R.E., Ilagan, J.O., Stirewalt, D.L., Meshinchi, S., and Bradley, R.K.  
1054 (2014). Sample processing obscures cancer-specific alterations in leukemic  
1055 transcriptomes. *Proc. Natl. Acad. Sci. U. S. A.* 111, 16802–16807.
- 1056 van Eijnsden, M., van der Wal, M.F., Hornstra, G., and Bonsel, G.J. (2005). Can Whole-  
1057 Blood Samples Be Stored over 24 Hours without Compromising Stability of C-Reactive  
1058 Protein, Retinol, Ferritin, Folic Acid, and Fatty Acids in Epidemiologic Research? *Clin.*  
1059 *Chem.* 51, 230–232.
- 1060 Ellis, V., and Danø, K. (1991). Plasminogen activation by receptor-bound urokinase. *J Biol*  
1061 *Chem.* 266, 12752–12758.
- 1062 Erbel, C., Tyka, M., Helmes, C.M., Akhavanpoor, M., Rupp, G., Domschke, G., Linden, F.,  
1063 Wolf, A., Doesch, A., Lasitschka, F., et al. (2015). CXCL4-induced plaque macrophages  
1064 can be specifically identified by co-expression of MMP7+S100A8+ in vitro and in vivo.  
1065 *Innate Immun.* 21, 255–265.
- 1066 Filén, S., and Lahesmaa, R. (2010). GIMAP Proteins in T-Lymphocytes. *J. Signal*  
1067 *Transduct.* 2010, 1–10.
- 1068 Gaertner, F., and Massberg, S. (2019). Patrolling the vascular borders: platelets in  
1069 immunity to infection and cancer. *Nat. Rev. Immunol.*
- 1070 Golebiewska, E.M., Harper, M.T., Williams, C.M., Savage, J.S., Goggs, R., Von Mollard,  
1071 G.F., and Poole, A.W. (2015). Syntaxin 8 regulates platelet dense granule secretion,  
1072 aggregation, and thrombus stability. *J. Biol. Chem.* 290, 1536–1545.
- 1073 Goods, B.A., Vahey, J.M., Steinschneider, A.F., Askenase, M.H., Sansing, L., and  
1074 Christopher Love, J. (2018). Blood handling and leukocyte isolation methods impact the  
1075 global transcriptome of immune cells. *BMC Immunol.* 19, 30.
- 1076 Hellquist, A., Zucchelli, M., Kivinen, K., Saarialho-Kere, U., Koskenmies, S., Widen, E.,  
1077 Julkunen, H., Wong, A., Karjalainen-Lindsberg, M.L., Skoog, T., et al. (2007). The human  
1078 GIMAP5 gene has a common polyadenylation polymorphism increasing risk to systemic  
1079 lupus erythematosus. *J. Med. Genet.* 44, 314–321.

- 1080 Henn, V., Slupsky, J.R., Gräfe, M., Anagnostopoulos, I., Förster, R., Müller-Berghaus, G.,  
1081 and Kroccek, R.A. (1998). CD40 ligand on activated platelets triggers an inflammatory  
1082 reaction of endothelial cells. *Nature* *391*, 591–594.
- 1083 Herro, R., Antunes, R.D.S., Aguilera, A.R., Tamada, K., and Croft, M. (2015). The Tumor  
1084 Necrosis Factor Superfamily Molecule LIGHT Promotes Keratinocyte Activity and Skin  
1085 Fibrosis. *J. Invest. Dermatol.* *135*, 2109–2118.
- 1086 Ignjatovic, V., Geyer, P.E., Palaniappan, K.K., Chaaban, J.E., Omenn, G.S., Baker, M.S.,  
1087 Deutsch, E.W., and Schwenk, J.M. (2019). Mass Spectrometry-Based Plasma  
1088 Proteomics: Considerations from Sample Collection to Achieving Translational Data. *J.*  
1089 *Proteome Res.* *18*, 4085–4097.
- 1090 Itoh-Nakadai, A., Hikota, R., Muto, A., Kometani, K., Watanabe-Matsui, M., Sato, Y.,  
1091 Kobayashi, M., Nakamura, A., Miura, Y., Yano, Y., et al. (2014). The transcription  
1092 repressors Bach2 and Bach1 promote B cell development by repressing the myeloid  
1093 program. *Nat. Immunol.* *15*, 1171–1180.
- 1094 Jenne, C.N., Urrutia, R., and Kubes, P. (2013). Platelets: Bridging hemostasis,  
1095 inflammation, and immunity. *Int. J. Lab. Hematol.* *35*, 254–261.
- 1096 Kaczorowski, K.J., Shekhar, K., Nkulikiyimfura, D., Dekker, C.L., Maecker, H., Davis,  
1097 M.M., Chakraborty, A.K., and Brodin, P. (2017). Continuous immunotypes describe human  
1098 immune variation and predict diverse responses. *Proc. Natl. Acad. Sci. U. S. A.* *114*,  
1099 E6097–E6106.
- 1100 Kaiser, M., Van Dullemen, L.F.A., Thézénas, M.L., Zeeshan Akhtar, M., Huang, H.,  
1101 Rendel, S., Charles, P.D., Fischer, R., Ploeg, R.J., and Kessler, B.M. (2016). Plasma  
1102 degradome affected by variable storage of human blood. *Clin. Proteomics* *13*, 26.
- 1103 Kelley, J.L., Rozek, M.M., Suenram, C.A., and Schwartz, C.J. (1987). Activation of human  
1104 blood monocytes by adherence to tissue culture plastic surfaces. *Exp. Mol. Pathol.* *46*,  
1105 266–278.
- 1106 Khan, S.Y., Kelher, M.R., Heal, J.M., Blumberg, N., Boshkov, L.K., Phipps, R., Gettings,  
1107 K.F., McLaughlin, N.J., and Silliman, C.C. (2006). Soluble CD40 ligand accumulates in  
1108 stored blood components, primes neutrophils through CD40, and is a potential cofactor in  
1109 the development of transfusion-related acute lung injury. *Blood* *108*, 2455–2462.
- 1110 Kotani, H., Masuda, K., Tamagawa-Mineoka, R., Nomiyama, T., Soga, F., Nin, M., Asai,  
1111 J., Kishimoto, S., and Katoh, N. (2012). Increased plasma LIGHT levels in patients with  
1112 atopic dermatitis. *Clin. Exp. Immunol.* *168*, 318–324.
- 1113 Krücken, J., Schmitt-Wrede, H.P., Markmann-Mulisch, U., and Wunderlich, F. (1997).  
1114 Novel gene expressed in spleen cells mediating acquired testosterone-resistant immunity  
1115 to *Plasmodium chabaudi* malaria. *Biochem. Biophys. Res. Commun.* *230*, 167–170.
- 1116 Londin, E.R., Hatzimichael, E., Loher, P., Edelstein, L., Shaw, C., Delgrosso, K., Fortina,  
1117 P., Bray, P.F., McKenzie, S.E., and Rigoutsos, I. (2014). The human platelet: Strong  
1118 transcriptome correlations among individuals associate weakly with the platelet proteome.  
1119 *Biol. Direct* *9*, 3.
- 1120 Massoni-Badosa, R., Iacono, G., Moutinho, C., Kulis, M., Palau, N., Marchese, D.,  
1121 Rodríguez-Ubreva, J., Ballestar, E., Rodríguez-Esteban, G., Marsal, S., et al. (2020).  
1122 Sampling time-dependent artifacts in single-cell genomics studies. *Genome Biol.* *21*, 112.
- 1123 McKenna, K.C., Beatty, K.M., Vicetti Miguel, R., and Bilonick, R.A. (2009). Delayed  
1124 processing of blood increases the frequency of activated CD11b+ CD15+ granulocytes  
1125 which inhibit T cell function. *J. Immunol. Methods* *341*, 68–75.
- 1126 Miyazaki, T., Kirino, Y., Takeno, M., Samukawa, S., Hama, M., Tanaka, M., Yamaji, S.,  
1127 Ueda, A., Tomita, N., Fujita, H., et al. (2010). Expression of heme oxygenase-1 in human  
1128 leukemic cells and its regulation by transcriptional repressor Bach1. *Cancer Sci.* *101*,  
1129 1409–1416.

- 1130 Nicholson, J.K.A., Jones, B.M., David Cross, G., and Steven McDougal, J. (1984).  
1131 Comparison of T and B cell analyses on fresh and aged blood. *J. Immunol. Methods* **73**,  
1132 29–40.
- 1133 Nizet, V., and Johnson, R.S. (2009). Interdependence of hypoxic and innate immune  
1134 responses. *Nat. Rev. Immunol.* **9**, 609–617.
- 1135 Ono, T., Kitaguchi, K., Takehara, M., Shiiba, M., and Hayami, K. (1981). Serum-  
1136 constituents analyses: effect of duration and temperature of storage of clotted blood. *Clin*  
1137 *Chem.* **27**, 35–38.
- 1138 Paardekooper, L.M., Bendix, M.B., Ottria, A., de Haer, L.W., Ter Beest, M., Radstake,  
1139 T.R.D.J., Marut, W., and van den Bogaart, G. (2018). Hypoxia potentiates monocyte-  
1140 derived dendritic cells for release of tumor necrosis factor  $\alpha$  via MAP3K8. *Biosci. Rep.* **38**.
- 1141 Pegels, G., Bruynes, E., Engelfriet, C.P., and Kr. von dem Borne, A. (1982).  
1142 Pseudothrombocytopenia: An Immunologic Study on Platelet Antibodies Dependent on  
1143 Ethylene Diamine Tetra-Acetate. *Blood* **59**, 157–161.
- 1144 Poeter, M., Radke, S., Koese, M., Hessner, F., Hegemann, A., Musiol, A., Gerke, V.,  
1145 Grewal, T., and Rescher, U. (2013). Disruption of the annexin A1/S100A11 complex  
1146 increases the migration and clonogenic growth by dysregulating epithelial growth factor  
1147 (EGF) signaling. *Biochim. Biophys. Acta - Mol. Cell Res.* **1833**, 1700–1711.
- 1148 Radich, J.P., Mao, M., Stepaniants, S., Biery, M., Castle, J., Ward, T., Schimmack, G.,  
1149 Kobayashi, S., Carleton, M., Lampe, J., et al. (2004). Individual-specific variation of gene  
1150 expression in peripheral blood leukocytes. *Genomics* **83**, 980–988.
- 1151 Rius, J., Guma, M., Schachtrup, C., Akassoglou, K., Zinkernagel, A.S., Nizet, V., Johnson,  
1152 R.S., Haddad, G.G., and Karin, M. (2008). NF- $\kappa$ B links innate immunity to the hypoxic  
1153 response through transcriptional regulation of HIF-1 $\alpha$ . *Nature* **453**, 807–811.
- 1154 Saba, H.I., Saba, S.R., and Morelli, G.A. (1984). Effect of heparin on platelet aggregation.  
1155 *Am. J. Hematol.* **17**, 295–306.
- 1156 Schauenburg, L., Liebsch, F., Eravci, M., Mayer, M.C., Weise, C., and Multhaupt, G.  
1157 (2018). APLP1 is endoproteolytically cleaved by  $\gamma$ -secretase without previous ectodomain  
1158 shedding. *Sci. Rep.* **8**, 1–12.
- 1159 Shaikh, R.B., Santee, S., Granger, S.W., Butrovich, K., Cheung, T., Kronenberg, M.,  
1160 Cheroutre, H., and Ware, C.F. (2001). Constitutive Expression of LIGHT on T Cells Leads  
1161 to Lymphocyte Activation, Inflammation, and Tissue Destruction. *J. Immunol.* **167**, 6330–  
1162 6337.
- 1163 Shen, Q., Björkesten, J., Galli, J., Ekman, D., Broberg, J., Nordberg, N., Tillander, A.,  
1164 Kamali-Moghaddam, M., Tybring, G., and Landegren, U. (2018). Strong impact on plasma  
1165 protein profiles by precentrifugation delay but not by repeated freeze-thaw cycles, as  
1166 analyzed using multiplex proximity extension assays. *Clin. Chem. Lab. Med.* **56**, 582–594.
- 1167 Skeate, J.G., Otsmaa, M.E., Prins, R., Fernandez, D.J., Da Silva, D.M., and Kast, W.M.  
1168 (2020). TNFSF14: LIGHTing the Way for Effective Cancer Immunotherapy. *Front.*  
1169 *Immunol.* **11**, 922.
- 1170 Sprent, J., and Surh, C.D. (2011). Normal T cell homeostasis: The conversion of naive  
1171 cells into memory-phenotype cells. *Nat. Immunol.* **12**, 478–484.
- 1172 Stuart, T., Butler, A., Hoffman, P., Stoeckius, M., Smibert, P., Satija, R., Hafemeister, C.,  
1173 Papalexi, E., Mauck Iii, W.M., and Hao, Y. (2019). Comprehensive Integration of Single-  
1174 Cell Data Resource Comprehensive Integration of Single-Cell Data. *Cell* **177**.
- 1175 Tanaka, M., Hirabayashi, Y., Sekiguchi, T., Inoue, T., Katsuki, M., and Miyajima, A.  
1176 (2003). Targeted disruption of oncostatin M receptor results in altered hematopoiesis.  
1177 *Blood* **102**, 3154–3162.
- 1178 Waggott, D., Chu, K., Yin, S., Wouters, B.G., Liu, F.F., and Boutros, P.C. (2012).  
1179 NanoStringNorm: An extensible R package for the pre-processing of nanostring mRNA

- 1180 and miRNA data. *Bioinformatics* 28, 1546–1548.
- 1181 Whitney, A.R., Diehn, M., Popper, S.J., Alizadeh, A.A., Boldrick, J.C., Relman, D.A., and  
1182 Brown, P.O. (2003). Individuality and variation in gene expression patterns in human  
1183 blood. *Proc. Natl. Acad. Sci. U. S. A.* 100, 1896–1901.
- 1184 Wroblewski, V.J., Witcher, D.R., Becker, G.W., Davis, K.A., Dou, S., Micanovic, R.,  
1185 Newton, C.M., Noblitt, T.W., Richardson, J.M., Song, H.Y., et al. (2003). Decoy receptor 3  
1186 (DcR3) is proteolytically processed to a metabolic fragment having differential activities  
1187 against Fas ligand and LIGHT. *Biochem. Pharmacol.* 65, 657–667.
- 1188 Wu, D. wen, Li, Y. meng, and Wang, F. (2017). How Long can we Store Blood Samples: A  
1189 Systematic Review and Meta-Analysis. *EBioMedicine* 24, 277–285.
- 1190 Yachie, A., Toma, T., Mizuno, K., Okamoto, H., Shimura, S., Ohta, K., Kasahara, Y., and  
1191 Koizumi, S. (2003). Heme oxygenase-1 production by peripheral blood monocytes during  
1192 acute inflammatory illnesses of children. *Exp. Biol. Med.* 228, 550–556.
- 1193 Yang, Y., Ma, L., Wang, C., Song, M., Li, C., Chen, M., Zhou, J., and Mei, C. (2020).  
1194 Matrix metalloproteinase-7 in platelet-activated macrophages accounts for cardiac  
1195 remodeling in uremic mice. *Basic Res. Cardiol.* 115.
- 1196 Zhang, X., Guo, J., Wei, X., Niu, C., Jia, M., Li, Q., Meng, D., and Khanna, K.K. (2018).  
1197 Bach1: Function, Regulation, and Involvement in Disease.
- 1198 Zimmerman, L.J., Li, M., Yarbrough, W.G., Slebos, R.J.C., and Liebler, D.C. (2012).  
1199 Global stability of plasma proteomes for mass spectrometry-based analyses. *Mol. Cell.*  
1200 *Proteomics* 11, 1–12.
- 1201 Zini, G. (2014). Stability of complete blood count parameters with storage: toward defined  
1202 specifications for different diagnostic applications. *Int. J. Lab. Hematol.* 36, 111–113.
- 1203

## Figure 1

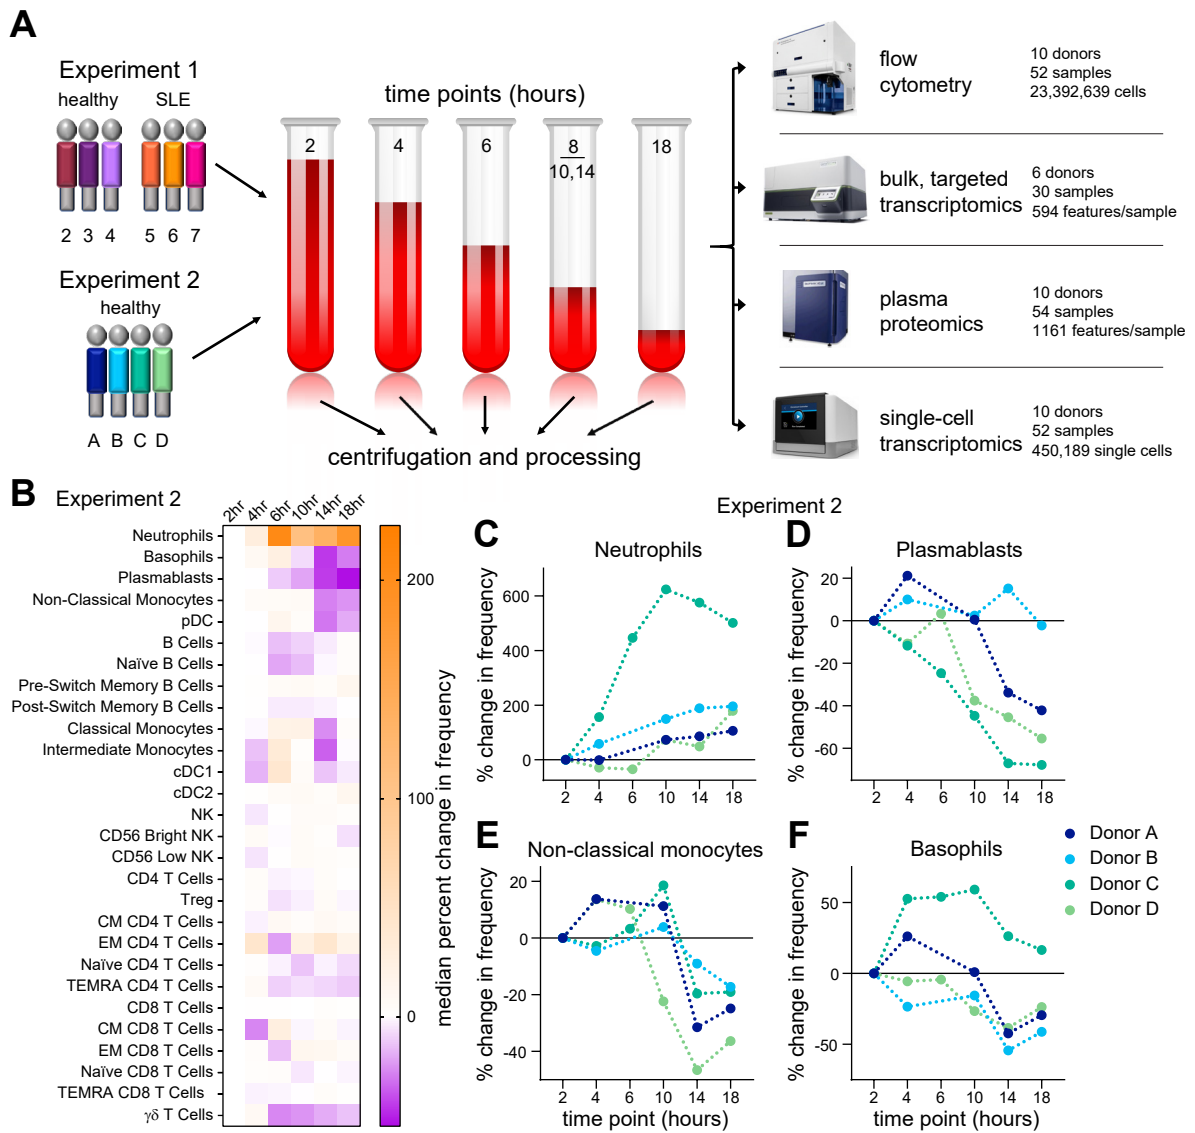

## Figure 2

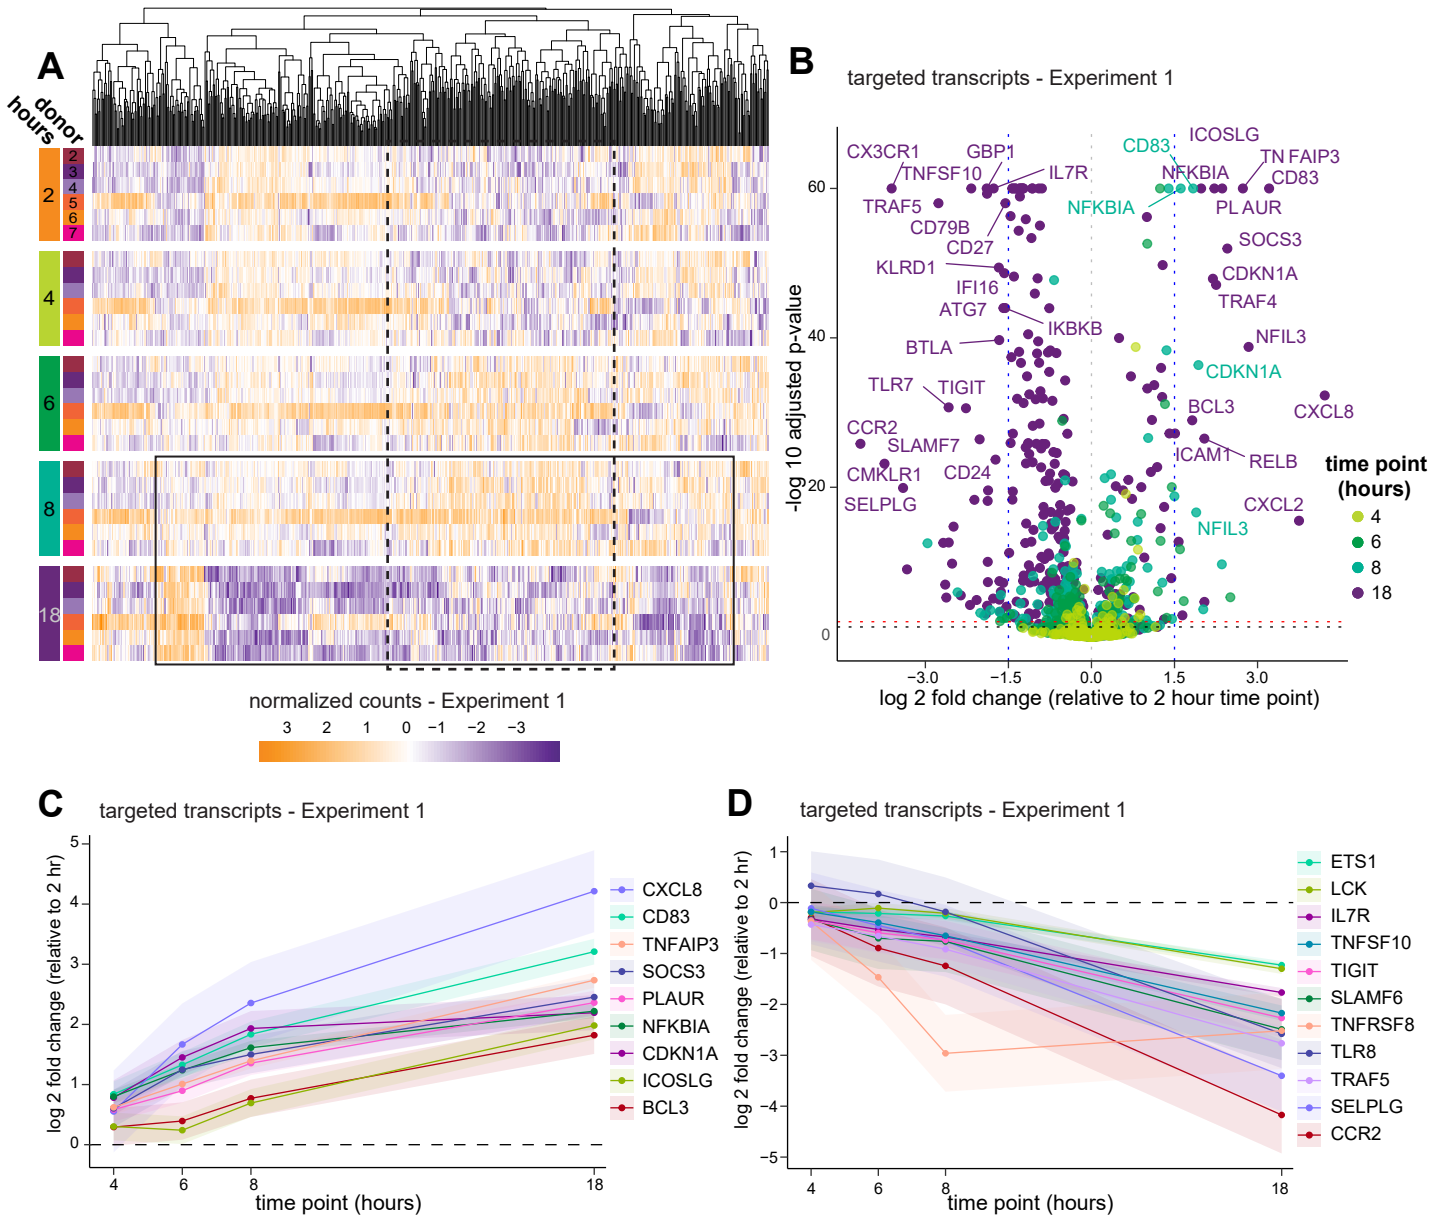

## Figure 3

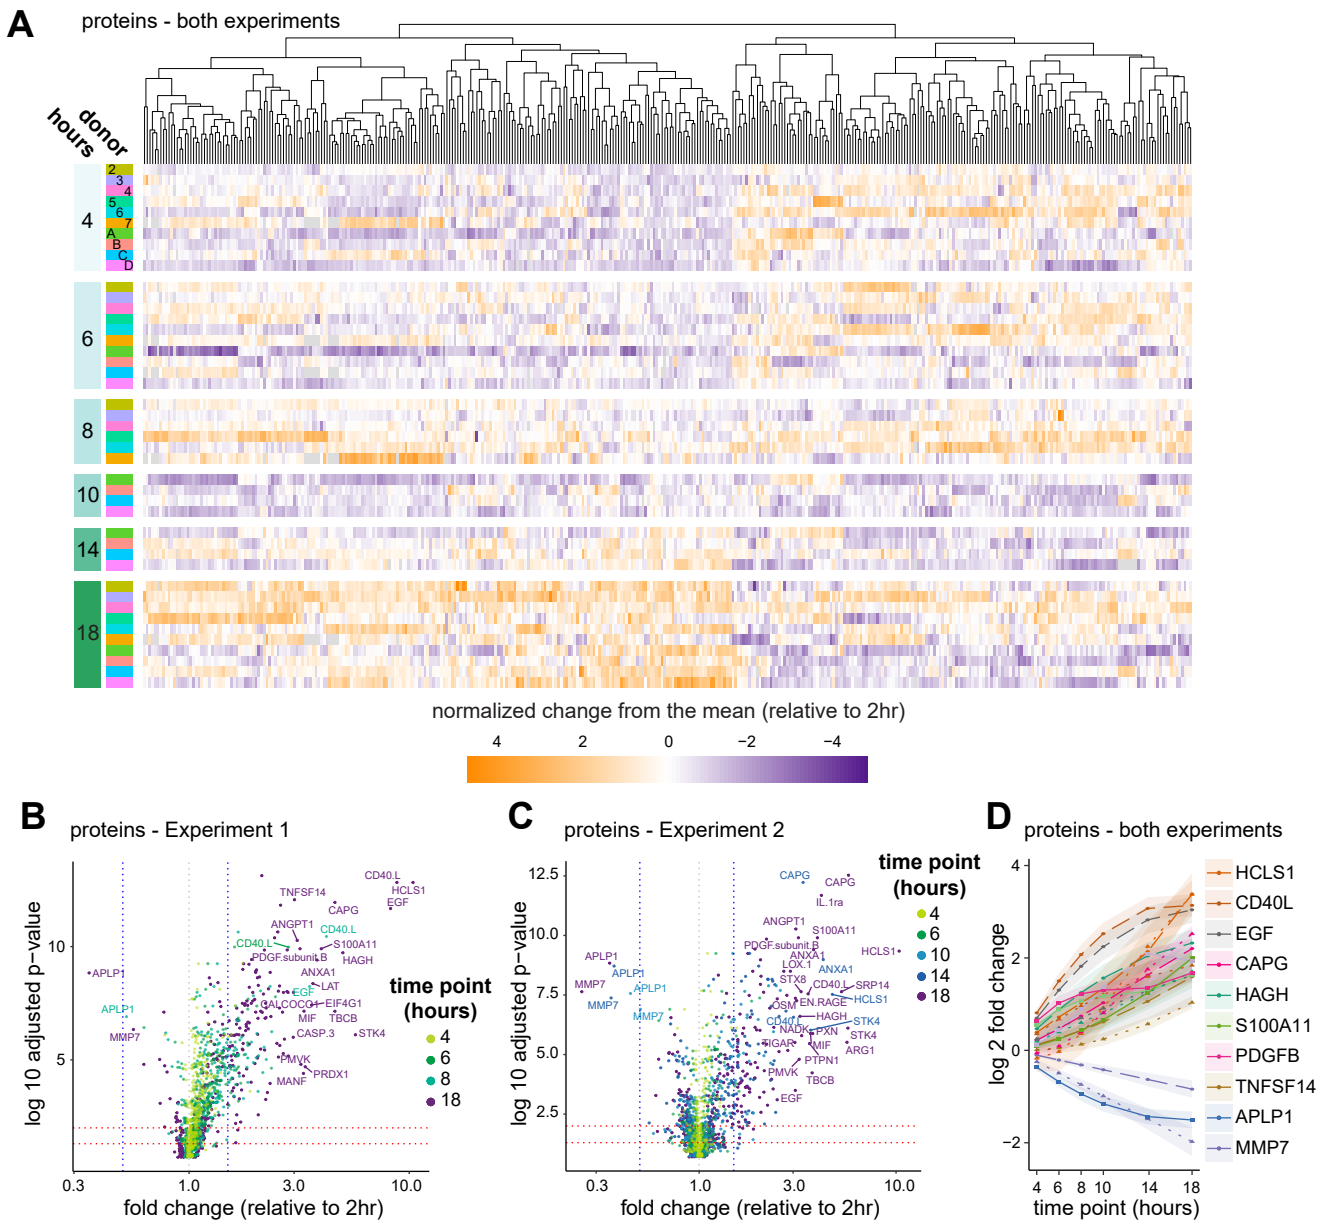



## Figure 4

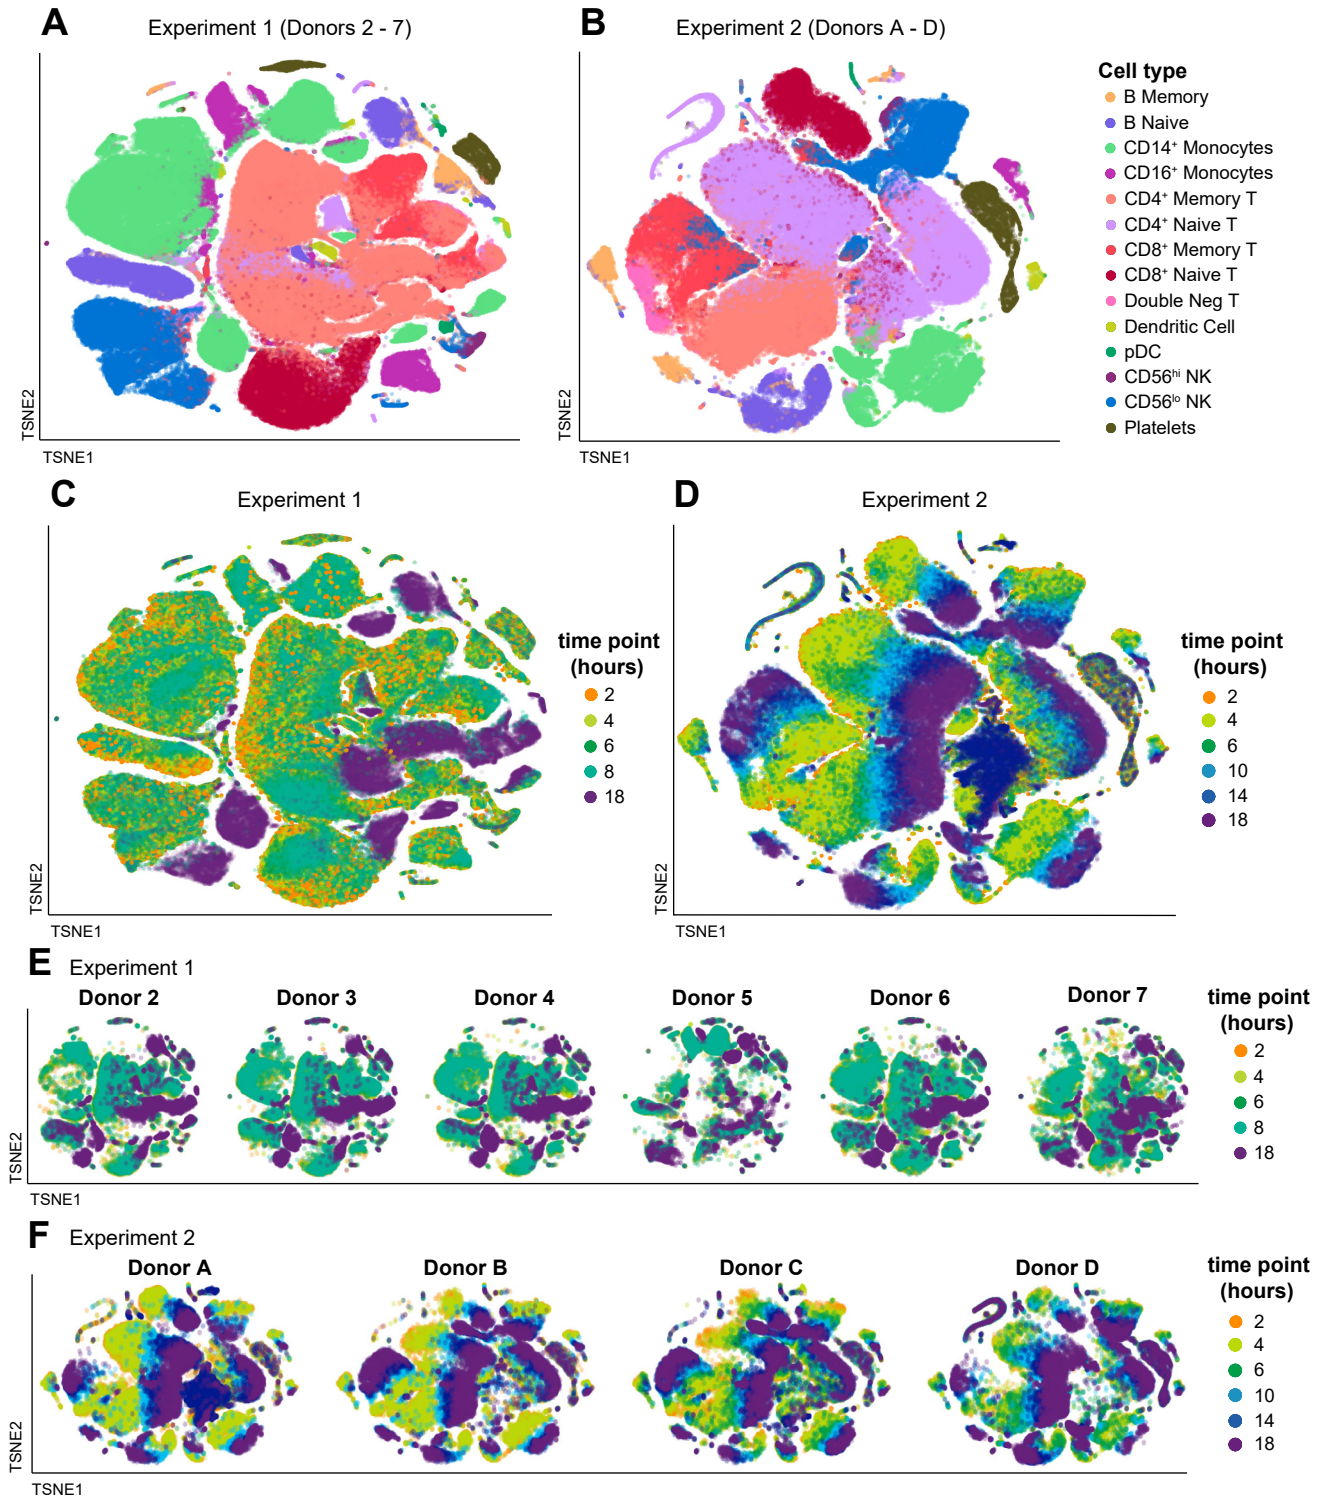

## Figure 5

Single-cell transcript - Experiment 2

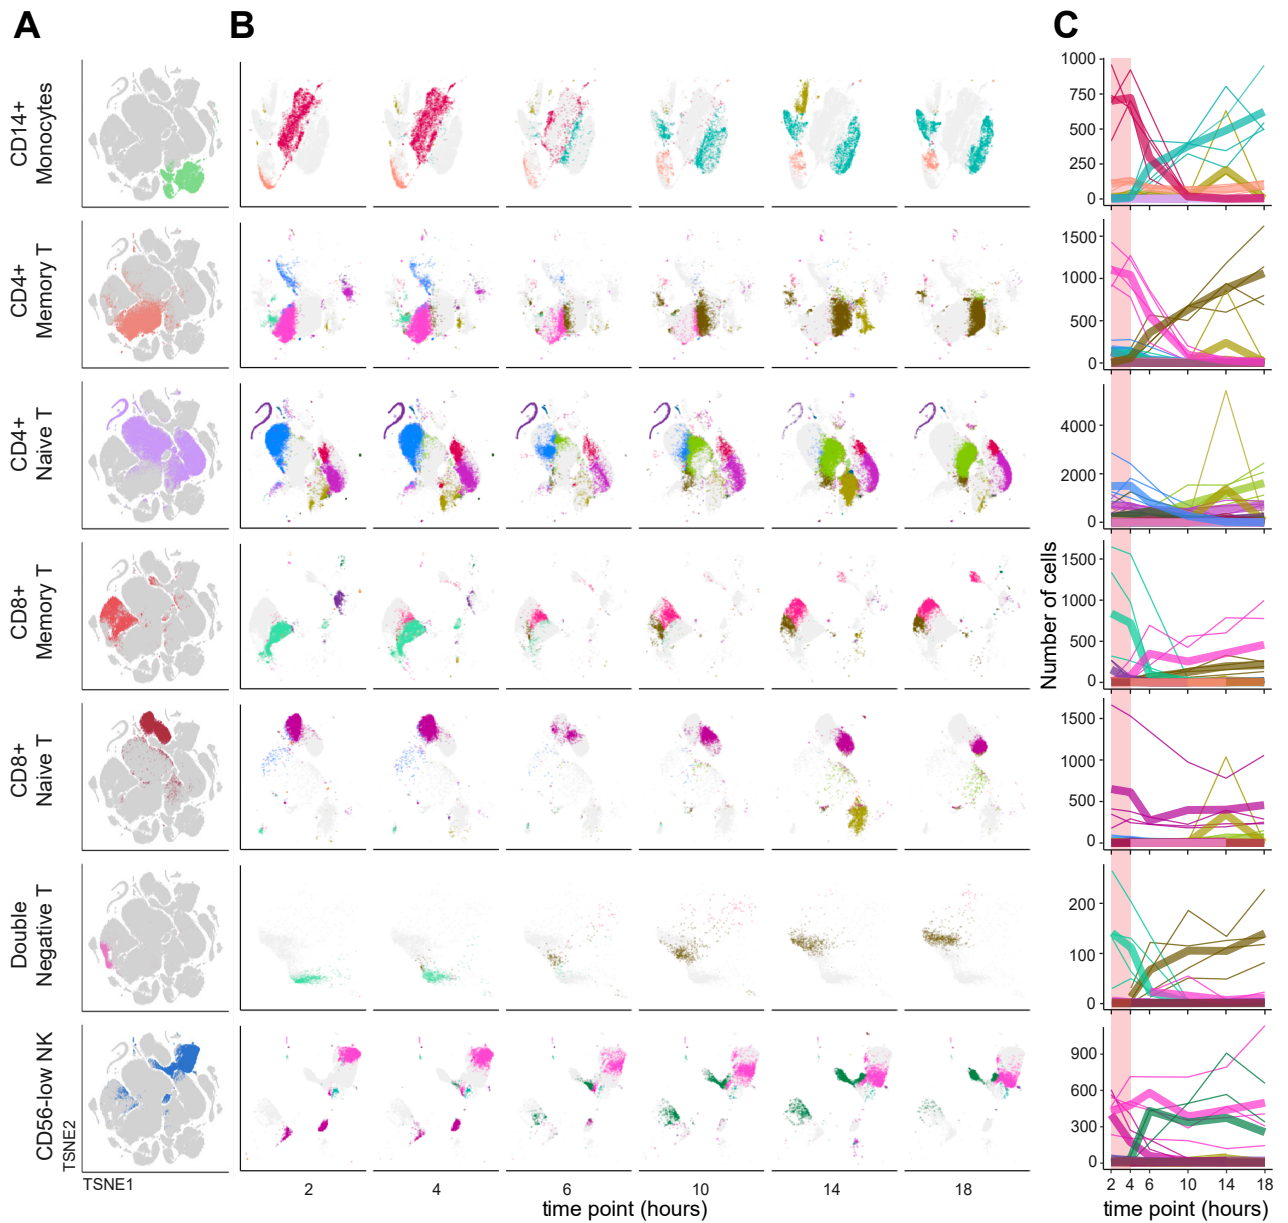

## Figure 6

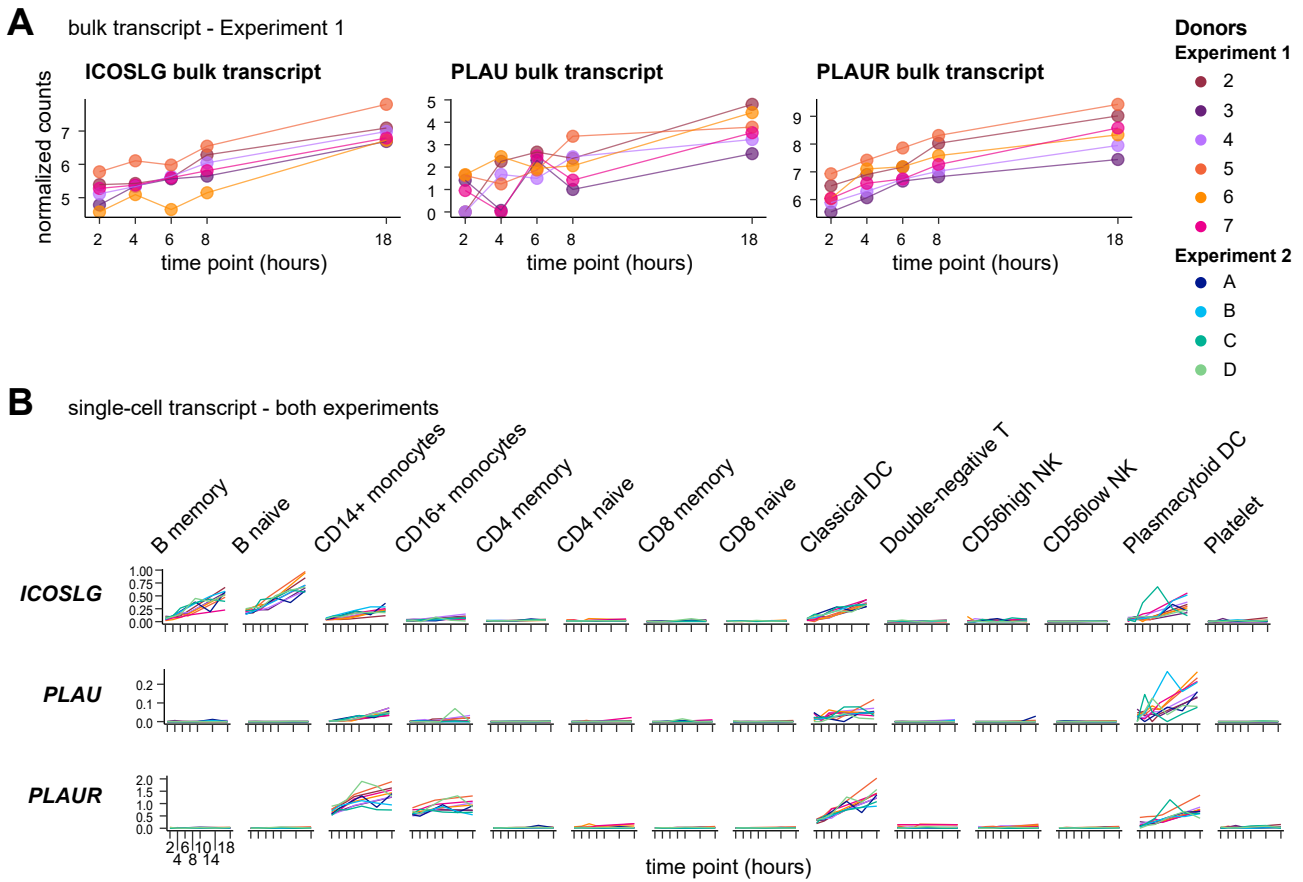

## Figure 7

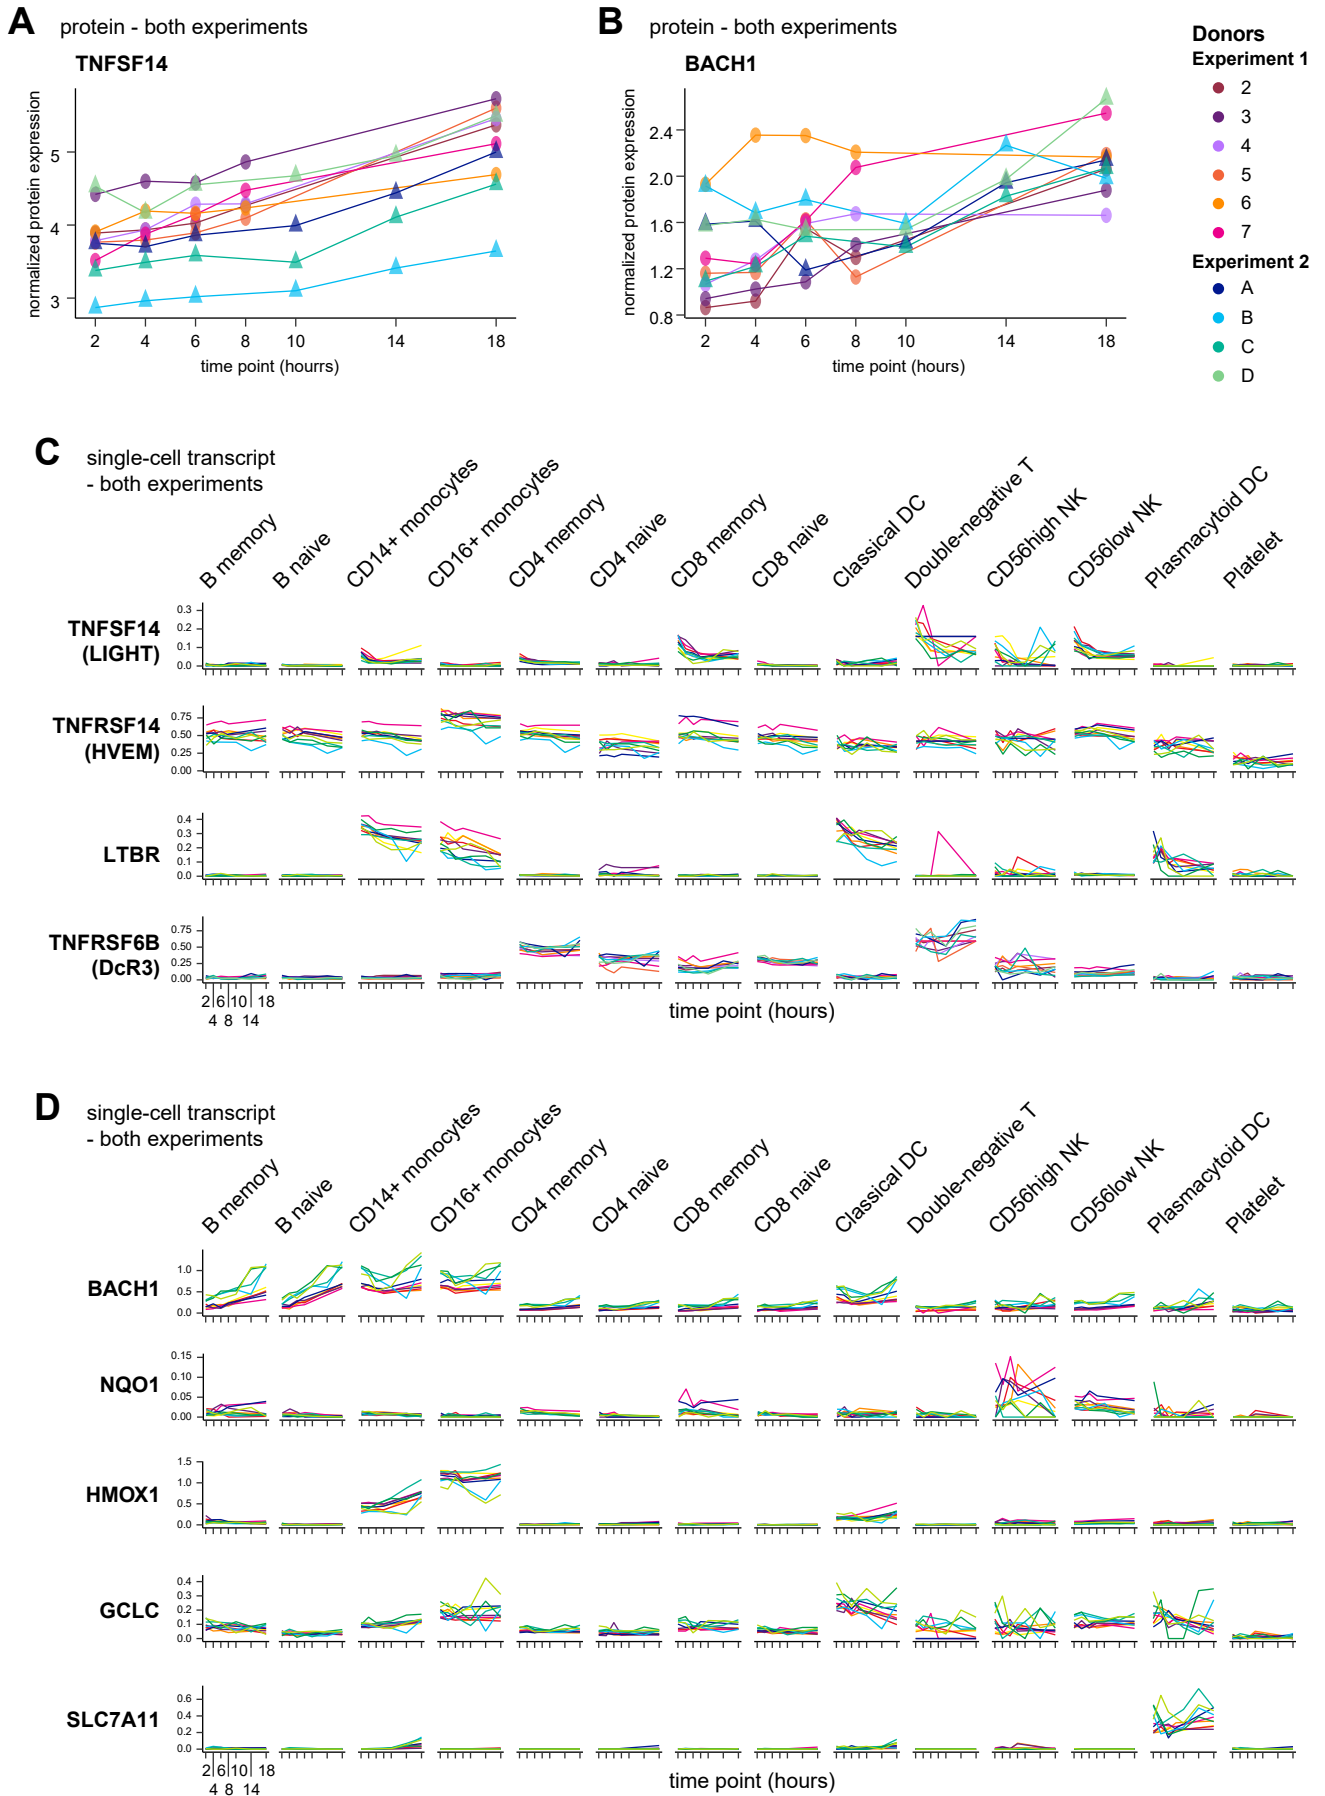

Source: https://www.biorxiv.org/content/biorxiv/early/2021/03/01/2020.10.18.344663.full.pdf
